# Supplementary material for: Expectations and illness perceptions as predictors of benefit recipiency among workers with common mental disorders: secondary analysis from a randomised controlled trial
Source: PubMed Central journal article supplement — BMJ Open. 2014 Mar 3;4(3):e004321. doi: 10.1136/bmjopen-2013-004321 (PMC3948454; doi:10.1136/bmjopen-2013-004321), 2014-03-03
Supplement: bmjopen-2013-004321.draft_revisions.pdf [file bmjopen-2013-004321.draft_revisions.pdf]

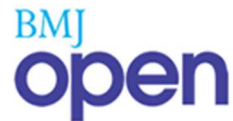

**Expectations and illness perceptions as predictors of work participation among workers with common mental disorders**

|                                 |                                                                                                                                                                                                                                                                                                                                                                                                                                                  |
|---------------------------------|--------------------------------------------------------------------------------------------------------------------------------------------------------------------------------------------------------------------------------------------------------------------------------------------------------------------------------------------------------------------------------------------------------------------------------------------------|
| Journal:                        | <i>BMJ Open</i>                                                                                                                                                                                                                                                                                                                                                                                                                                  |
| Manuscript ID:                  | bmjopen-2013-004321                                                                                                                                                                                                                                                                                                                                                                                                                              |
| Article Type:                   | Research                                                                                                                                                                                                                                                                                                                                                                                                                                         |
| Date Submitted by the Author:   | 23-Oct-2013                                                                                                                                                                                                                                                                                                                                                                                                                                      |
| Complete List of Authors:       | Løvvik, Camilla; Uni Research, Uni Health<br>Shaw, William; Liberty Mutual, Research Institute for Safety; University of Massachusetts Medical School, Department of Family Medicine and Community Health<br>Øverland, Simon; University of Bergen, Department of Health Promotion and Development; Norwegian Institute of Public Health, Department of Public Mental Health, Division of Mental Health<br>Reme, Silje; Uni Research, Uni Health |
| <b>Primary Subject Heading</b>: | Mental health                                                                                                                                                                                                                                                                                                                                                                                                                                    |
| Secondary Subject Heading:      | Rehabilitation medicine, Occupational and environmental medicine, Public health                                                                                                                                                                                                                                                                                                                                                                  |
| Keywords:                       | MENTAL HEALTH, Adult psychiatry < PSYCHIATRY, PUBLIC HEALTH, REHABILITATION MEDICINE, Human resource management < HEALTH SERVICES ADMINISTRATION & MANAGEMENT, Health policy < HEALTH SERVICES ADMINISTRATION & MANAGEMENT                                                                                                                                                                                                                       |
|                                 |                                                                                                                                                                                                                                                                                                                                                                                                                                                  |

SCHOLARONE™  
Manuscripts

only

1  
2  
3  
4 **EXPECTATIONS AND ILLNESS PERCEPTIONS AS PREDICTORS OF WORK**  
5  
6 **PARTICIPATION AMONG WORKERS WITH COMMON MENTAL DISORDERS**  
7

8 Correspondence to:  
9

10 Camilla Løvvik  
11

12 Uni Health  
13

14 Uni Health, Uni Research, POB 7810, NO-5020, Bergen, Norway  
15

16 Phone: + 47 55 58 32 68  
17

18 Fax: + 47 55 58 98 78  
19

20 Email: [camilla.lovvik@uni.no](mailto:camilla.lovvik@uni.no)  
21  
22  
23

24  
25  
26 Camilla Løvvik<sup>1</sup>, William Shaw<sup>2,3</sup>, Simon Øverland<sup>4</sup>, Silje Endresen Reme<sup>1</sup>  
27

28 <sup>1</sup>Uni Health, Uni Research, Bergen, Norway  
29

30 <sup>2</sup>Liberty Mutual Research Institute for Safety, Hopkinton, Massachusetts, USA  
31  
32

33 <sup>3</sup>Department of Family Medicine and Community Health, Worcester, Massachusetts, USA  
34  
35

36 <sup>4</sup>Department of Health Promotion and Development, University of Bergen, Norway  
37  
38

39 <sup>5</sup>Department of Public Mental Health, Division of Mental Health, Norwegian Institute of  
40  
41 Public Health, Bergen, Norway  
42  
43  
44  
45

46 *Key words: Common mental disorders, return-to-work expectations, illness perceptions, work*  
47  
48 *participation, sick leave*  
49

50 Word Count: 3637  
51  
52  
53  
54  
55  
56  
57  
58  
59  
60

## Abstract

### Objective

Common mental disorders (CMDs) are among the leading causes of sick leave, and more knowledge on factors related to Return-to-Work (RTW) in CMDs is needed. The aim of this study was to investigate RTW-expectations and illness perceptions as predictors of non-RTW in CMDs.

### Design

Study participants were enrolled in a randomized controlled trial and reported CMDs as a main obstacle for work participation. Baseline questionnaire data and registry data at 6 months were used to investigate predictors of non-RTW. Non-RTW was operationalized as being on sick leave or long-term benefits at 6 months follow-up. Three pre-specified sub-groups were included: people on sick leave, people at risk of going on sick leave, or people on long-term benefits (>12 months).

### Results

In this study, uncertain and negative RTW-expectations were strong predictors of non-RTW at 6 months follow-up. Maladaptive illness perceptions predicted non-RTW in the unadjusted model, but not in the fully adjusted model. In the sub-group on sick leave, both uncertain and negative RTW-expectations predicted non-RTW, while in the sub-group of people at risk of going on sick leave, negative RTW-expectations predicted non-RTW. In the sub-group on long-term benefits only female gender predicted non-RTW.

## Conclusion

Uncertain and negative RTW-expectations predict non-RTW in CMDs. The RTW-expectations vary depending on sick leave status and seem specifically important to target in those at risk of going on sick leave, or currently on sick leave, due to CMDs. RTW-interventions in CMDs should consider targeting RTW-expectations early, even prior to actual sick leave episodes.

### Strengths and limitations of this study:

- Sick leave status was highly heterogeneous in our study population. This allowed investigation of the chosen factors as predictors of work participation across various sick leave statuses.
- Actual work participation (primary outcome) was measured using registry based data on sick leave and long-term benefits.
- Although return-to-work expectations were found to be strong predictors of work participation within this study population, generalization of our results may be difficult as an expressed wish to work was one of the criteria for inclusion.
- A version of B-IPQ using the generic term “your illness” rather than “common mental disorders” was used. Hence, participants may have given responses based on illnesses other than CMDs.
- RTW-expectations are not as predicative of work participation as RTW self-efficacy. Including measures on RTW self-efficacy in future studies would possibly add to the present findings.

## INTRODUCTION

### Background

Work contributes to financial stability and offers a structure to everyday life, possibilities for personal development and social interaction; all factors found to promote good mental health and well-being[1]. In societies where work is the norm, having a job to go to on a regular basis is an important part of life, and assumed to be beneficial for the individual[1].

Common mental disorders (CMDs) - most often symptoms of anxiety and depression – pose a specific threat to work participation by restricting individuals' employability, reducing functionality, and thereby also negatively affecting income, self-esteem and quality of life[2, 3]. A recent study from the U.S. found a lifetime prevalence of 33.7% for any anxiety disorder and 21.4% for any mood disorder, and in comparison to other major public health challenges, CMDs commonly occur in working age[4]. CMDs account for a large proportion of all long-term sick leave[5]. Of those sick listed with CMDs for more than 6 months, only 50% manage to return-to-work (RTW)[6]. CMDs increase risk for prolonged sick leave[7] and work disability[8], and as disability pensions for CMDs on average are awarded at a younger age, the affiliated loss of working years is immense[9]. In Norway CMDs account for approximately 20% of sick leave episodes and about one third of all disability pensions[10]. Thus, CMDs are not only costly for the individual but for the greater society as well.

Considering the high prevalence of CMDs, and their disabling and potentially catastrophic occupational outcomes, CMDs represent a major challenge to occupational health.

The volume of studies on what hinders and facilitates work participation in MHPs is growing. Findings show that predictors of RTW in CMDs are both wide ranging and many[6, 11, 12] covering factors such as gender, self-rated health status, illness duration, and symptom severity[13]. Factors related to work, health risk behaviours, social status as well as medical factors have also been found to prevent RTW after episodes of poor mental health[6]. In

1  
2  
3 recent years, several studies have pointed out that RTW following sickness absence is a  
4  
5 multifaceted and complex process[14, 15].  
6

7  
8 Self-efficacy, defined as “the belief in ones’ abilities to organize and execute the courses of  
9  
10 action required to produce given attainments”[16] is central to initiation and perseverance of  
11  
12 behaviour[17]. Recent studies have therefore looked at behaviour-specific self-efficacy beliefs  
13  
14 such as RTW self-efficacy (RTW-SE)[18] and found this to strongly predict RTW in  
15  
16 CMDs[19]. Return-to-Work expectations are closely related to RTW–SE, and in a study on  
17  
18 sick-listed temporary agency workers it was found that expecting a full RTW, as well as  
19  
20 perceiving ones’ own health as moderate to good, strongly predicted actual RTW[20].  
21

22  
23 In other health conditions such as myocardial infarction and musculoskeletal disorders,  
24  
25 complex psychological constructs such as people’s beliefs about their illness or diagnosis  
26  
27 (“illness perceptions”) have been found to predict RTW[21]. Illness perceptions consist of  
28  
29 cognitive and emotional representations that guide health behaviours and have been suggested  
30  
31 to impact on the transition from disease to health and work-related outcomes[22].  
32

33  
34 Although the relation between illness perceptions and work participation has been  
35  
36 investigated in other health conditions, little is known about the impact these self-regulatory  
37  
38 processes have on actual RTW in CMDs[21, 23]. A recent cross-sectional study of the  
39  
40 association between illness perceptions and RTW-expectations in CMDs found a strong and  
41  
42 salient relationship between the two[24]. Maladaptive illness perceptions were associated with  
43  
44 uncertain- and negative RTW-expectations, with stronger associations for the negative RTW-  
45  
46 expectations, with stronger associations for the negative RTW-  
47  
48 expectations.  
49

50  
51 To the best of our knowledge, the impact of illness perceptions on sickness absence in CMDs  
52  
53 has not been studied longitudinally.  
54  
55  
56  
57  
58  
59  
60

1  
2  
3 Although some interventions aiming to increase RTW in CMDs exist[25], there still is a need  
4  
5 for more knowledge concerning specific factors to target and modify in order to continue the  
6  
7 development and improvement of successful RTW-interventions in CMDs.  
8  
9

## 10 11 **Objectives**

12  
13  
14 The aim of this study was to examine if RTW-expectations and illness perceptions predicted  
15  
16 non-RTW in a population struggling with work participation due to CMDs, and whether the  
17  
18 predictors differed in the three pre-specified sub-groups (on sick leave, at risk of going on  
19  
20 sick leave, or on long-term benefits).  
21

22  
23 The specific aims were to i) examine if RTW-expectations and illness perceptions predicted  
24  
25 non-RTW 6 months later, and in each separate sub-group; ii) examine how uncertain and  
26  
27 negative RTW-expectations predicted non-RTW, iii) examine how each component of illness  
28  
29 perceptions individually predicted non-RTW and iv) investigate the relative predictive  
30  
31 contribution of illness perceptions and RTW-expectations when adjusting for relevant  
32  
33 confounders.  
34

35  
36 We hypothesized that uncertain or negative RTW-expectations and maladaptive illness  
37  
38 perceptions would predict non-RTW in all participants. In other words, we hypothesized that  
39  
40 perceiving illness to have more and severe consequences and having negative RTW-  
41  
42 expectations would predict non-RTW at 6 months follow-up.  
43  
44  
45  
46

## 47 **METHODS**

### 48 49 **Design**

50  
51 The At Work and Coping trial (AWaC) (Trial registration - <http://www.clinicaltrials.gov>,  
52  
53 NCT01146730) is a randomized controlled multicentre trial evaluating the effect of Work-  
54  
55 focused Cognitive Behavioural Therapy (CBT) and an adaptation of Individual Placement and  
56  
57  
58  
59  
60

1  
2  
3 Support (IPS) on RTW in CMDs. The trial commenced in June 2010 and includes 1193  
4  
5 participants. Participants were referred to the trial from their General Practitioners (GPs) or  
6  
7 local national insurance offices, but also by self-referral after receiving information through  
8  
9 websites or advertisement posters in GPs offices. A detailed overview of participant flow and  
10  
11 enrolment has previously been published[24]. In the AWaC trial, an important criterion for  
12  
13 inclusion was the participants' own experience of CMDs as an obstacle for work participation  
14  
15 regardless of actual sick leave status. This was clearly stated in brochures, posters and on  
16  
17 websites. Hence, the AWaC trial included participants self-reporting to be at risk of going on  
18  
19 sick leave, currently on sick leave or on long-term benefits due to CMDs.  
20  
21

22  
23 Prior to inclusion, all participants underwent a 30-minute interview where they were screened  
24  
25 for eligibility and given more detailed information about the study. Eligible and willing  
26  
27 participants provided informed consent and filled in the baseline questionnaire. This  
28  
29 questionnaire included various measures on demographic variables and measures on mental  
30  
31 and somatic health complaints. The trial had two arms where the control condition consisted  
32  
33 of usual care, mainly follow-up from GPs, other RTW-interventions or occupational health  
34  
35 care. No effect of the intervention was found on RTW at 6 months follow up. For the purpose  
36  
37 of this study, the groups were not analysed separately, but group allocation (intervention  
38  
39 versus control) was included as a covariate in the logistic regression models.  
40  
41

42  
43 In the current study, we applied a longitudinal design with 6 months follow-up. Study  
44  
45 procedures were reviewed and approved by The Regional Ethics Committee and all Helsinki  
46  
47 declaration principles were followed.  
48  
49

#### 50 51 52 53 54 **Statistical analysis**



1  
2  
3 Binary logistic regression analysis was used to examine RTW-expectations (uncertain and  
4 negative) and illness perceptions as predictors of non-RTW. First, we examined RTW-  
5 expectations and illness perceptions as individual predictors along with relevant confounders  
6 in a model applying the full sample regardless of sick leave status at baseline. Second, all  
7 significant predictors of non-RTW together with basic demographic variables (gender, age  
8 and educational level) were included in an adjusted model. We then repeated these analyses  
9 stratified on the three pre-specified groups: those at risk of going on sick leave, those sick-  
10 listed, and finally those on long-term benefits. Data from national registries on sick leave  
11 episodes and benefits supplied information on whether a participant was currently working,  
12 on sick leave or on long-term benefits at baseline and were used to sort all participants into  
13 the three pre-specified groups.  
14  
15  
16  
17  
18  
19  
20  
21  
22  
23  
24  
25  
26  
27  
28  
29  
30  
31

### 32 Confounders

33  
34 Instruments measuring health status included the Hospital Anxiety and Depression scale  
35 (HAD)[26] for CMDs and the SHC inventory[27] for subjective health complaints. Self-  
36 reported health status was measured by one question in the wording “How would you  
37 describe your own health?” with answers ranging from “Very good” to “Very poor” on a five  
38 point Likert scale. Illness duration was measured by a single item asking participants how  
39 long they had had mental health problems (in years). Beliefs concerning the impact of work  
40 participation on MHPs were assessed by asking participants “If you continue working, how  
41 do you think it will affect your complaints?”. Answers were given on a five point Likert scale  
42 ranging from “It will worsen my condition” to “It will be very beneficial”. Participants were  
43 also asked if they had signed private disability insurance agreements (yes/no). A Norwegian  
44 standard for classification of occupations was used to group self-reported occupational titles  
45  
46  
47  
48  
49  
50  
51  
52  
53  
54  
55  
56  
57  
58  
59  
60

1  
2  
3 into either blue- or white-collar work. This standard complies with the ISCO-88 (COM)  
4  
5 standards.

## 9 Predictors

### 11 *Return-to-Work Expectations*

12  
13  
14 RTW-expectations were assessed by asking participants to respond to the following  
15  
16 statement: “I expect to be back at work within the next few weeks”. Thus, for the sub-group at  
17  
18 risk of going on sick leave, the response to this item would imply “staying at work”, as  
19  
20 opposed to falling out of work and onto sick-leave, whilst for the other two sub-groups (sick-  
21  
22 listed and on long-term benefits), the response to this item would imply “returning to work”.  
23  
24 For the purposes of this paper, however, the responses from all participants were labelled  
25  
26 “RTW-expectations”. Participants responded on a five point Likert scale (“strongly agree” to  
27  
28 “strongly disagree”). Responses were grouped in three comprising those who strongly agreed  
29  
30 or agreed into positive RTW-expectations, those answering “neither agree nor disagree” into  
31  
32 uncertain RTW-expectations, and those either disagreeing or strongly disagreeing into  
33  
34 negative RTW-expectations.  
35  
36  
37  
38  
39

### 40 *Illness perceptions*

41  
42  
43 Illness perceptions were measured using the Brief Illness Perception Questionnaire[28]. This  
44  
45 nine-item questionnaire provides a rapid and reliable measurement of illness perceptions.  
46  
47 Items 1 through 8 are rated on a 0-10 response scale. The ninth B-IPQ item is open-ended and  
48  
49 registers attribution of causal mechanisms. All nine items were analysed separately in the  
50  
51 current study.  
52  
53  
54  
55

## 56 Primary outcome measure

1  
2  
3 A dichotomous variable from national registries consisting of information on sick leave  
4 episodes and benefits for all participants was used as primary outcome measure in this study.  
5  
6

7 The variable was dichotomized so that those sick-listed or on long-term benefits were  
8 separated from those working at 6 months follow up.  
9  
10

## 11 12 13 **RESULTS**

### 14 **Clinical and demographic characteristics of study population**

15  
16 The study population consisted of more women than men (67.1%), and was characterized by a  
17 mean age of 40.4 years and education at university or postgraduate levels (60.5%). More  
18 people scored above the clinical cut-off for anxiety (78%) compared to depression (53%) on  
19 the HADS questionnaire, and self-reported average illness duration was 8.6 years.  
20  
21  
22  
23  
24  
25  
26

27 In Table 1 we present a full overview of demographic and clinical characteristics, including  
28 RTW-expectations and illness perceptions, of those at risk of going on sick leave, sick-listed  
29 or on long-term benefits.  
30  
31  
32  
33  
34  
35  
36  
37  
38  
39  
40  
41  
42  
43  
44  
45  
46  
47  
48  
49  
50  
51  
52  
53  
54  
55  
56  
57  
58  
59  
60

Table 1: Baseline demographic and clinical characteristics of participants

|                                                        | Total       | Baseline job-status |                        |                                  | F        |
|--------------------------------------------------------|-------------|---------------------|------------------------|----------------------------------|----------|
|                                                        |             | Working<br>(n=334)  | Sick listed<br>(n=529) | Receiving<br>benefits<br>(n=330) |          |
| <b>Continuous variables</b>                            |             |                     |                        |                                  |          |
|                                                        | Mean (SD)   | Mean (SD)           | Mean (SD)              | Mean (SD)                        |          |
| Age                                                    | 40.4 (9.7)  | 40.4 (9.9)          | 40.3 (9.4)             | 40.5 (9.8)                       | 0.3      |
| Subjective Health Complaints (SHC)                     |             |                     |                        |                                  |          |
| Total score                                            | 20.5 (10.6) | 19.2 (10.4)         | 20.9 (10.4)            | 21.3 (11.1)                      | 4.0*     |
| Hospital Anxiety and Depression Scale                  |             |                     |                        |                                  |          |
| Total score                                            | 18.8 (6.9)  | 18.3 (6.8)          | 19.1 (6.9)             | 18.5 (6.8)                       | 1.6      |
| The Brief-Illness Perception<br>Questionnaire (0 – 10) |             |                     |                        |                                  |          |
| Consequences <sup>1</sup>                              | 7.1 (1.9)   | 6.6 (2.1)           | 7.2 (1.8)              | 7.3 (1.8)                        | 15.6*    |
| Timeline <sup>1</sup>                                  | 5.9 (2.4)   | 6.0 (2.5)           | 5.5 (2.3)              | 6.5 (2.5)                        | 16.7*    |
| Personal control                                       | 4.1 (2.2)   | 4.1 (2.2)           | 4.1 (2.1)              | 4.3 (2.2)                        | 0.6      |
| Treatment control                                      | 6.9 (2.1)   | 6.9 (2.1)           | 7.0 (2.0)              | 6.6 (2.2)                        | 3.7*     |
| Identity <sup>1</sup>                                  | 6.6 (2.1)   | 6.3 (2.2)           | 6.6 (2.0)              | 6.9 (2.0)                        | 8.2*     |
| Illness concern <sup>1</sup>                           | 6.5 (2.3)   | 6.3 (2.4)           | 6.5 (2.3)              | 6.5 (2.2)                        | 0.7      |
| Understanding                                          | 6.2 (2.4)   | 6.0 (2.5)           | 6.0 (2.4)              | 6.4 (2.5)                        | 2.3      |
| Emotional response <sup>1</sup>                        | 7.7 (2.0)   | 7.6 (2.1)           | 7.6 (2.0)              | 7.8 (1.9)                        | 1.3      |
| Illness duration (years)                               | 8.6 (9.7)   | 8.9 (9.7)           | 6.5 (8.5)              | 11.6 (10.8)                      | 23.8*    |
| Self-reported health status (1-5) <sup>2</sup>         | 2.7 (0.8)   | 2.6 (0.8)           | 2.7 (0.8)              | 2.9 (0.8)                        | 10.9*    |
| Work and health (1-5) <sup>3</sup>                     | 2.9 (1.5)   | 3.2 (1.4)           | 2.5 (1.4)              | 3.1 (1.5)                        | 22.7*    |
| <b>Categorical variables</b>                           |             |                     |                        |                                  |          |
|                                                        | N (%)       | N (%)               | N (%)                  | N (%)                            | $\chi^2$ |
| Return-to-Work Expectations                            |             |                     |                        |                                  |          |
| Positive                                               | 326 (32.3)  | 110 (10.9)          | 155 (15.4)             | 61 (6.1)                         | 55.3*    |
| Uncertain                                              | 312 (31.0)  | 63 (6.3)            | 160 (15.9)             | 89 (8.8)                         | 0.1      |
| Negative                                               | 370 (36.7)  | 37 (3.7)            | 197 (19.5)             | 136 (13.5)                       | 48.1*    |
| Gender                                                 |             |                     |                        |                                  |          |
| Female                                                 | 800 (67.1)  | 197 (16.5)          | 375 (31.4)             | 228 (19.1)                       | 13.9*    |
| Education                                              |             |                     |                        |                                  |          |
| University/Postgraduate college                        | 722 (60.5)  | 213 (17.9)          | 327 (27.5)             | 182 (15.3)                       | 5.5      |
| Blue collar workers                                    | 391 (33.9)  | 90 (7.8)            | 166 (14.4)             | 135 (11.7)                       | 16.6*    |
| Private disability insurance                           | 294 (26.2)  | 83 (7.4)            | 147 (13.1)             | 64 (5.7)                         | 7.5*     |
| Mental health status, HADS, (cut<br>off=>8)            |             |                     |                        |                                  |          |
| Anxiety                                                | 926 (78.2)  | 255 (21.5)          | 421 (35.6)             | 250 (21.1)                       | 2.2      |
| Depression                                             | 633 (53.5)  | 162 (13.7)          | 294 (24.8)             | 177 (14.9)                       | 4.3      |

<sup>1</sup>=Higher score indicates more maladaptive illness perceptions

\*=significant at the .05 level

<sup>2</sup>=Lower score indicates better self-reported health status

<sup>3</sup>=Higher score indicates perceiving work participation as more beneficial for health (mental health problems)

### Predictors of return to work at 6 months follow-up

Both uncertain and negative RTW-expectations predicted non-RTW at 6 months follow-up (Table 2). The fully adjusted model showed that other statistically significant predictors of non-RTW were gender (female), illness duration (longer) and self-reported health status (moderate to poor). In the unadjusted model, illness perceptions pertaining to *consequences* (more and severe) and *timeline* (long lasting), ascribing many experienced symptoms to the illness (*identity*), being concerned about the illness (*illness concern*), and experiencing emotional distress (*emotional response*), also predicted non-RTW.

Table 2. Logistic regression results of return-to-work expectations and illness perceptions as predictors of non-RTW at 6 months follow-up regardless of sick leave status at baseline

|                                          | Predictor variables                               | Unadjusted model<br>OR (95% CI) | <i>p</i> -value | Adjusted model<br>OR (95% CI) | <i>p</i> -value |
|------------------------------------------|---------------------------------------------------|---------------------------------|-----------------|-------------------------------|-----------------|
| Basic demographics                       | Gender                                            | 1.18 (0.93 to 1.51)             | 0.171           | 1.55 (1.10 to 2.18)           | 0.011           |
|                                          | Age                                               | 1.00 (0.98 to 1.01)             | 0.963           | 1.00 (0.98 to 1.02)           | 0.529           |
|                                          | Educational level                                 | 0.79 (0.62 to 1.00)             | 0.051           | 0.99 (0.68 to 1.43)           | 0.968           |
| Return-to-work expectations <sup>1</sup> | Uncertain                                         | 1.84 (1.33 to 2.53)             | 0.001           | 2.07 (1.39 to 3.06)           | <0.001          |
|                                          | Negative                                          | 3.99 (2.91 to 5.47)             | 0.001           | 3.89 (2.61 to 5.79)           | <0.001          |
| Illness Perceptions                      | Consequences                                      | 1.17 (1.10 to 1.25)             | <0.001          | 1.11 (0.98 to 1.25)           | 0.078           |
|                                          | Timeline                                          | 1.10 (1.05 to 1.16)             | <0.001          | 1.03 (0.95 to 1.11)           | 0.414           |
|                                          | Personal control*                                 | 0.98 (0.93 to 1.03)             | 0.527           |                               |                 |
|                                          | Treatment control*                                | 0.97 (0.91 to 1.02)             | 0.260           |                               |                 |
|                                          | Identity                                          | 1.16 (1.09 to 1.22)             | <0.001          | 1.09 (0.98 to 1.21)           | 0.083           |
|                                          | Illness Concern                                   | 1.06 (1.01 to 1.11)             | 0.017           | 0.97 (0.89 to 1.06)           | 0.977           |
|                                          | Understanding*                                    | 1.00 (0.963 to 1.05)            | 0.713           |                               |                 |
|                                          | Emotional response                                | 1.05 (1.00 to 1.12)             | 0.049           | 0.90 (0.81 to 1.00)           | 0.066           |
| Causal attributions                      | Work                                              | 0.82 (0.62 to 1.08)             | 0.173           |                               |                 |
|                                          | Stress                                            | 0.91 (0.62 to 1.32)             | 0.625           |                               |                 |
|                                          | Personal relationships                            | 0.83 (0.59 to 1.16)             | 0.294           |                               |                 |
| Mental health status                     | HADS total score                                  | 1.02 (1.00 to 1.04)             | 0.009           | 0.99 (0.96 to 1.02)           | 0.993           |
| Subjective health complaints             | SHC total score                                   | 1.02 (1.01 to 1.03)             | <0.001          | 1.00 (0.98 to 1.01)           | 0.975           |
|                                          | Illness duration (in years)                       | 1.02 (1.01 to 1.04)             | <0.001          | 1.03 (1.01 to 1.05)           | <0.001          |
|                                          | Group allocation<br>(intervention vs. control)    | 1.03 (0.82 to 1.29)             | 0.774           |                               |                 |
|                                          | Blue-collar workers                               | 1.51 (1.18 to 1.93)             | 0.001           | 1.44 (0.98 to 2.10)           | 0.057           |
|                                          | Private disability insurance                      | 1.15 (0.88 to 1.50)             | 0.292           |                               |                 |
|                                          | Work and health <sup>2</sup> (1-5)                | 0.89 (0.82 to 0.97)             | 0.008           | 0.94 (0.85 to 1.05)           | 0.317           |
|                                          | Self-reported health status <sup>3</sup><br>(1-5) | 1.43 (1.24 to 1.65)             | <0.001          | 1.26 (1.02 to 1.57)           | 0.033           |

<sup>1</sup>Reference category: Positive RTW-expectations. <sup>2</sup>Higher score indicates perceiving work as having more positive effects on health. <sup>3</sup>Higher score indicates worse self-reported health status. \*Higher score indicates more adaptive illness perceptions.

1  
2  
3 Return-to-work at 6 months follow up was experienced by 264 (79.0%) of those working but at  
4 risk of going on sick leave, by 288 (54.4%) of those sick-listed and by 73 (22.1%) of those on  
5 long-term benefits.  
6  
7  
8  
9

#### 10 Group I: Working at baseline

11 For those working but at risk of going on sick leave, negative RTW-expectations and illness  
12 duration (in years) were the only significant predictors of non-RTW at 6 months follow-up in the  
13 unadjusted model. In the fully adjusted model, negative RTW-expectations remained the single  
14 significant predictor for non-RTW (Table 3).  
15  
16  
17  
18  
19  
20  
21

#### 22 Group II: Sick-listed at baseline

23 In the unadjusted model for those who were sick-listed at baseline, both uncertain and negative  
24 RTW-expectations predicted non-RTW at 6 months follow-up. The illness perception  
25 components *consequences*, *timeline* and *identity*, were all individual predictors of non-RTW in  
26 the unadjusted model. Additionally, self-reported poor health, perceiving work as detrimental for  
27 health, higher scores on mental health status (HADS), subjective health complaints (SHC),  
28 occupational grade (blue collar work), and lower education were also predictors of non-RTW. In  
29 the fully adjusted model only uncertain and negative RTW-expectations remained significant  
30 predictors of non-RTW (Table 3).  
31  
32  
33  
34  
35  
36  
37  
38  
39  
40  
41  
42

#### 43 Group III: On long-term benefits at baseline

44 In those on long-term benefits, only negative RTW-expectations predicted non-RTW in the  
45 unadjusted model. In the fully adjusted model negative RTW-expectations was borderline  
46 significant ( $p=0.050$ ) while female gender significantly predicted non-RTW (Table 3).  
47  
48  
49  
50  
51  
52  
53  
54  
55  
56  
57  
58  
59  
60

Table 3. Significant predictors of non-RTW in adjusted logistic regression models for subgroups working but at risk of sick leave (n=334), on sick leave (n=529) or on long-term disability benefits (n=330).

| Predictor variables <sup>1</sup>               | Working*<br>(at risk of sick leave)<br>OR (95%CI) | On sick leave**<br>OR (95%CI) | On long-term<br>benefits***<br>OR (95%CI) |
|------------------------------------------------|---------------------------------------------------|-------------------------------|-------------------------------------------|
| Basic demographics                             |                                                   |                               |                                           |
| Gender                                         | 1.83 (0.89 to 3.78)                               | 1.59 (0.99 to 2.56)           | <b>0.37 (0.17 to 0.79)</b>                |
| Age                                            | 0.99 (0.95 to 1.03)                               | 0.99 (0.97 to 1.02)           | 0.99 (0.96 to 1.02)                       |
| Educational level                              | 1.06 (0.51 to 2.19)                               | 0.71 (0.45 to 1.10)           | 1.46 (0.79 to 2.69)                       |
| Return-to-work expectations <sup>2</sup>       |                                                   |                               |                                           |
| Uncertain                                      | 1.92 (0.85 to 4.33)                               | <b>2.62 (1.47 to 4.67)</b>    | 0.61 (0.28 to 1.30)                       |
| Negative                                       | <b>3.03 (1.22 to 7.53)</b>                        | <b>3.78 (2.11 to 6.76)</b>    | 2.19 (1.00 to 4.79)                       |
| Illness Perceptions                            |                                                   |                               |                                           |
| Consequences                                   |                                                   | 1.10 (0.94 to 1.29)           |                                           |
| Timeline                                       |                                                   | 1.01 (0.91 to 1.13)           |                                           |
| Personal control*                              |                                                   |                               |                                           |
| Treatment control*                             |                                                   |                               |                                           |
| Identity                                       |                                                   | 1.03 (0.90 to 1.18)           |                                           |
| Illness Concern                                |                                                   |                               |                                           |
| Understanding*                                 |                                                   |                               |                                           |
| Emotional response                             |                                                   |                               |                                           |
| Causal attributions                            |                                                   |                               |                                           |
| Work                                           |                                                   |                               |                                           |
| Stress                                         |                                                   |                               |                                           |
| Personal relationships                         |                                                   |                               |                                           |
| Mental health status                           |                                                   |                               |                                           |
| HADS total score                               |                                                   | 0.99 (0.95 to 1.03)           |                                           |
| Subjective health complaints                   |                                                   |                               |                                           |
| SHC total score                                |                                                   | 1.00 (0.98 to 1.03)           |                                           |
| Illness duration (in years)                    | 1.03 (0.99 to 1.06)                               | 1.02 (0.99 to 1.05)           |                                           |
| Group allocation<br>(intervention vs. control) |                                                   |                               |                                           |
| Blue-collar workers                            |                                                   | 1.09 (0.65 to 1.84)           |                                           |
| Private disability insurance                   |                                                   |                               |                                           |



|                                                |                     |
|------------------------------------------------|---------------------|
| Work and health <sup>3</sup> (1-5)             | 0.87 (0.75 to 1.02) |
| Self-reported health status <sup>4</sup> (1-5) | 1.24 (0.93 to 1.66) |

<sup>1</sup>Investigated in unadjusted logistic regression models for all three sub-groups, significant predictors carried forward to adjusted models: \*Adjusted for demographic variables gender, age educational level, illness duration and RTW-expectations, \*\*Adjusted for demographic variables gender, age educational level, RTW-expectations, illness perception components *consequences, timeline, identity*, mental health and subjective health complaints, illness duration, occupational grade, beliefs concerning the effect of work on health and self-reported health status \*\*\*Adjusted for demographic variables gender, age educational level and RTW-expectations.

<sup>2</sup>Reference category: Positive RTW-expectations. <sup>3</sup>Higher score indicates perceiving work as having more positive effects on health. <sup>4</sup>Higher score indicates worse self-reported health status. \*Higher score indicates more adaptive illness perceptions. Significant predictors highlighted in bold.

## DISCUSSION

### Main findings

In this study we investigated return-to-work expectations and illness perceptions as predictors of non-RTW in people with CMDs struggling with work participation. We further investigated RTW-expectations and illness perceptions as predictors of non-RTW in three pre-specified sub-groups based on participants' sick leave status; working but at risk of sick leave, currently sick-listed, or on long-term benefits. Both uncertain and negative RTW-expectations were strong predictors of non-RTW in our study population as a whole, as well as in the sub-group of those currently sick-listed. Negative RTW-expectations predicted non-RTW in workers at risk of sick leave, while in those receiving long-term benefits, only female gender predicted non-RTW at the 6-months follow-up. Negative RTW-expectations was borderline significant in those on long-term benefits. Maladaptive illness perceptions concerning consequences, timeline, identity, illness concern and emotional response were all significant predictors of non-RTW in the unadjusted logistic regression model for the full sample as well as the sub-group of sick-listed participants. Illness perceptions did, however, not predict non-RTW in the fully adjusted models for any of the three sub-groups.

### *Predictors of non-Return to Work*

#### Illness perceptions

Previous studies have shown that illness perceptions predict RTW after myocardial infarction and in musculoskeletal disorders[21, 29]. Furthermore, one study found beliefs about duration and consequences of illness acting as perpetuating factors in long-term sick leave for patients

1  
2  
3 with a variety of disorders[30].Our findings thus concur with these previous studies, although the  
4  
5 associations in the current study were not maintained in the fully adjusted models.  
6  
7

8  
9  
10 None of the illness perceptions significantly predicted non-RTW in the adjusted model for those  
11  
12 on sick leave, whilst uncertain and negative RTW-expectations did. From our previous study, we  
13  
14 saw that some of the illness perceptions were particularly strongly associated with the uncertain  
15  
16 and negative RTW-expectations[24]. We therefore find it plausible to assume that although not  
17  
18 statistically significant predictors of non-RTW in this study, illness perceptions may still be part  
19  
20 of the underlying factors comprising RTW-expectations. It appears intuitively and clinically  
21  
22 sound that perceiving ones' illness as having more severe consequences and affecting more life  
23  
24 domains might impact on the RTW-process. One such impact could be asserted on beliefs or  
25  
26 decisions related to work participation, for instance when deciding on readiness to RTW.  
27  
28 Furthermore, believing that illness will last for a longer time is likely to impact on how a person  
29  
30 perceives the future possibilities for RTW, something that could be involved in the construction  
31  
32 and reporting of RTW-expectations. Future studies on RTW in workers sick listed with CMDs  
33  
34 would benefit from including assessments on illness perceptions in order to gain more  
35  
36 knowledge on the role these psychological processes might play.  
37  
38  
39  
40  
41  
42  
43  
44  
45

#### 46 Return-to-Work Expectations

47  
48 Our findings show that psychological factors such as ones' own uncertain or negative RTW –  
49  
50 expectations are strong predictors of non-RTW in CMDs. This corresponds with previous  
51  
52 research showing RTW-expectations to repeatedly predict actual RTW[31-33].  
53  
54  
55  
56

1  
2  
3 Previous research findings suggest that health improvement alone is not enough to RTW, and  
4 that psychological factors as well are of importance in RTW [34]. Self-efficacy, defined as “the  
5 belief in one’s abilities to organize and execute the courses of action required to produce given  
6 attainments”[16] is essential in the processes that make us initiate and later sustain our  
7 behaviours[17]. Considering RTW-expectations, these would depend on a persons’ belief in the  
8 ability to RTW. In our study, RTW-expectations predicted non-RTW more strongly than  
9 symptom severity of CMDs as measured by HADS. This finding contrasts previous research  
10 where symptom severity has been found to be an important predictor of RTW in study  
11 populations similar to the one studied here[12]. This may be due to the simple fact that previous  
12 studies did not include RTW-expectations in their models. We therefore suggest that future  
13 studies on RTW in CMDs include systematic evaluation of participants’ RTW-expectations.  
14 In our study, negative RTW-expectations predicted non-RTW in those not yet sick listed, but  
15 self-reporting to struggle with work participation. This finding stresses the importance of  
16 identifying negative RTW-expectations early in cases where CMDs represent a barrier to optimal  
17 work participation. In an occupational health care setting, such early identification followed by  
18 modification of negative RTW-expectations might prevent future sick-leave episodes and  
19 disability.

20  
21  
22 Another important finding of this study was that in those sick-listed, uncertain RTW-  
23 expectations predicted non-RTW, although not as strongly as negative RTW-expectations. This  
24 corresponds with a previous study where uncertain RTW-expectations were associated with a  
25 longer time to RTW in workers with soft tissue injuries, with an even stronger association for  
26 negative RTW-expectations [35].  
27  
28  
29  
30  
31  
32  
33  
34  
35  
36  
37  
38  
39  
40  
41  
42  
43  
44  
45  
46  
47  
48  
49  
50  
51  
52  
53  
54  
55  
56  
57  
58  
59  
60

1  
2  
3 A persons' own predictions, as well as RTW-expectations, have been shown to be better  
4  
5 predictors of RTW than the opinion of health care professionals[32], and we therefore suggest  
6  
7 that addressing RTW-expectations in occupational health care would be a helpful approach.  
8  
9

10  
11  
12 An important characteristic of our study population was that participants' sick leave statuses  
13  
14 varied from "working but at risk of going on sick leave" to "sick-listed and" and "on long-term  
15  
16 benefits". This heterogeneity allowed for investigation of RTW-expectations and illness  
17  
18 perceptions across sick leave status. As a result we were able to reveal that the predictive value  
19  
20 of RTW-expectations may vary dependent on sick leave status, thus adding to the literature.  
21  
22 Further, the B-IPQ, a reliable and rapid measure, was used to assess the participants' illness  
23  
24 perceptions. The use of this measure allowed for comparison with other study populations using  
25  
26 the B-IPQ, and ensured that we measured the participants' actual illness perceptions. The  
27  
28 procedure of a one-item measurement of RTW-expectations has previously been demonstrated to  
29  
30 be sufficient[36] and the single item used to measure RTW-expectations in the present study has  
31  
32 been found to measure important aspects of RTW-expectations in low back pain patients[37].  
33  
34 Additionally, we have previously used this item to investigate the association between illness  
35  
36 perceptions and RTW-expectations within the same study population as in the current study[24].  
37  
38 The use of registry based data to measure RTW and hence securing complete follow-up on all  
39  
40 participants in our sample is also a considerable strength of the study.  
41  
42  
43  
44  
45  
46  
47  
48  
49

50  
51 Selection bias cannot be ruled out as a potential limitation of our study, as those choosing to join  
52  
53 this study could be qualitatively different from those declining to participate. However, as only  
54  
55 17 persons of 1416 screened declined to participate it can be argued that the study population is a  
56  
57

1  
2  
3 representative sample of the help-seeking population struggling with work participation due to  
4  
5  
6 CMDs in Norway.

7  
8 In this study we used a version of B-IPQ failing to explicitly ask for participants' perceptions of  
9  
10 their CMDs, using the more generic term "your illness". This could represent a limitation to our  
11  
12 study if participants answered the B-IPQ with other illnesses than CMDs in mind. An important  
13  
14 characteristic shared by all participants, however, is that they all enter the study due to CMDs  
15  
16 being the primary reason for their struggles with work participation. Hence, we consider this  
17  
18 potential limitation to be of little importance.  
19  
20

21  
22 Recent studies have shown that differences in RTW self-efficacy are more predictive of RTW  
23  
24 than RTW-expectations[38]. Failing to include extensive measures on RTW self-efficacy in our  
25  
26 study might represent a limitation. However, no extensive RTW self-efficacy measure is as of  
27  
28 yet available in Norwegian language, and we suggest that future studies include such measures  
29  
30 when available.  
31  
32  
33  
34  
35

### 36 **Conclusion**

37  
38 The current study provides important insight into predictors of non-RTW in CMDs and the  
39  
40 different roles these predictors play for people at risk of going on sick leave, currently sick-listed  
41  
42 or on long-term benefits. A better understanding of the RTW process should ultimately lead to  
43  
44 improvement of RTW-interventions, and thus the clinical implications of our findings need to be  
45  
46 considered. One of the key findings in this study was that both uncertain and negative RTW-  
47  
48 expectations predicted non-RTW at 6 months follow-up over actual symptoms of CMDs. As  
49  
50 RTW-expectations are potentially modifiable, we suggest that RTW-interventions integrate a  
51  
52 focus on RTW-expectations along with the focus on reducing MHPs. Another key finding was  
53  
54  
55  
56  
57  
58  
59  
60

1  
2  
3 that RTW-expectations vary depending on sick leave status. Further, negative RTW-expectations  
4  
5 predicted non-RTW at 6 months follow-up in those working but at risk of sick leave. A practical  
6  
7 implication of this finding might be to focus on early identification and assessment of RTW-  
8  
9 expectations not only in cases where sick leave has already been certified, but also in those cases  
10  
11 where workers self-report to struggle with work participation due to CMDs. In order to get  
12  
13 people talking about experiencing CMDs as a barrier to satisfactory work participation, more  
14  
15 openness and knowledge concerning CMDs at the workplace could be needed.  
16  
17

18  
19 For those sick-listed, uncertain as well as negative RTW-expectations predicted non-RTW. On  
20  
21 the basis of these findings we suggest that interventions aiming to improve RTW in CMDs focus  
22  
23 on improving RTW-expectations and that special attention be paid to uncertain as well as  
24  
25 negative RTW-expectations in those sick listed. As we have previously shown, the illness  
26  
27 perceptions component *consequences* is strongly associated with RTW-expectations. We suggest  
28  
29 that this component be targeted in RTW-interventions, and specifically considering perceptions  
30  
31 of the impact from CMDs on work, as work participation may be a positive contribution to  
32  
33 mental health and well-being.  
34  
35

36  
37 Yet another key finding is that RTW-expectations did not predict non-RTW for those on long-  
38  
39 term benefits. Although negative RTW-expectations was borderline significant, we suggest that  
40  
41 for those on long-term benefits other factors may be more important for future work participation  
42  
43 than RTW-expectations.  
44  
45

46  
47 As previous studies have highlighted, “short term sick leave may have consequences for future  
48  
49 sick leave beyond the effect of ill health” [39], and we believe our findings further stress the  
50  
51 importance of identifying negative or uncertain RTW-expectations early on, even before a sick  
52  
53 leave episode occurs.  
54  
55

## Figure legends

Table 1: Baseline demographic and clinical characteristics of participants

Table 2: Logistic regression results of return-to-work expectations and illness perceptions as predictors of non-RTW at 6 months follow-up regardless of sick leave status at baseline

Table 3: Significant predictors of non-RTW in adjusted logistic regression models for subgroups working, but at risk of sick leave (n=334), on sick leave (n=529) or on long-term disability benefits (n=330).

## Acknowledgements

This study was funded by the Norwegian Labour and Welfare Administration. Ingrid Blø Olsen contributed to the categorisation of causal attributions on the Brief Illness Perception Questionnaire and categorisation of participants' occupational grade.

## Author contributor statement

CL contributed to data collection, conception and design of the study, performed data analysis, interpreted findings, wrote up the first draft of the study and consequent revisions regarding important intellectual content. WS contributed to critical revision of important intellectual content and revision of analysis. SØ contributed to conception and design of the study, critical revision of the manuscript and its analysis. SER contributed to conception and design of the study, to the first draft of the study and its consequent revisions, and oversaw the revision of the study.

SER is the guarantor of this study.



## Sources of funding and other support

The project was commissioned by the Norwegian Ministry of Health and Ministry of Labour, and financed through the National Strategy on Work and Mental Health (2007-2012). The funder had an active role in the initiation and implementation of the project, but had no role in the analyses of results or the decision to submit the article for publication.

## Data sharing

No additional data available.

## References

1. Waddell G, Burton K. Is work good for your health and well-being?, 2006.
2. Dekkers-Sanchez PM, Hoving JL, Sluiter JK, Frings-Dresen MHW. Factors associated with long-term sick leave in sick-listed employees: a systematic review *Occup Environ Med* 2008;**65**:153-157.
3. Eaton WW, Martins SS, Nestadt G, Bienvenu OJ, Clarke D, Alexandre P. The Burden of Mental Disorders *Epidemiologic Reviews* 2008;**30**:1-14.
4. Kessler RC, Petukhova M, Sampson NA, Zaslavsky AM, Wittchen H-U. Twelve-month and lifetime prevalence and lifetime morbid risk of anxiety and mood disorders in the United States *Int J of Methods Psychiatr Res* 2012;**21**:169-184.
5. Stansfeld SA, Fuhrer R, Head J. Impact of common mental disorders on sickness absence in an occupational cohort study *Occup Environ Med* 2011;**68**:408-413.
6. Blank L, Peters J, Pickvance S. A Systematic Review of the Factors which Predict Return to Work for People Suffering Episodes of Poor Mental Health *J Occup Rehabil* 2008;**18**:17-34.
7. Knudsen AK, Harvey SB, Mykletun A, Overland S. Common mental disorders and long-term sickness absence in a general working population. The Hordaland Health Study *Acta Psychiatr Scand* 2013;**127**:287-297.
8. Knudsen AK, Overland S, Aakvaag HF, Harvey SB, Hotopf M, Mykletun A. Common mental disorders and disability pension award: Seven year follow-up of the HUSK study *J Psychosom Res* 2010;**69**:59-67.
9. Knudsen AK, Overland S, Hotopf M, Mykletun A. Lost Working Years Due to Mental Disorders: An Analysis of the Norwegian Disability Pension Registry *PLoS One* 2012;**7**.

- 1  
2  
3 10. Brage S, Nossen JP, Kann IC, Thune O. Sykefravær med diagnose innen psykiske lidelser  
4  
5 2000 - 2011: The Norwegian Welfare and Labour Administration, 2012.  
6  
7
- 8 11. Cornelius LR, van der Klink JJJ, Groothoff JW, Brouwer S. Prognostic Factors of Long  
9  
10 Term Disability Due to Mental Disorders: A Systematic Review *J Occup Rehabil*  
11  
12 2011;**21**:259-274.  
13  
14
- 15 12. Brouwers EP, Terluin B, Tiemens BG, Verhaak PF. Predicting return to work in employees  
16  
17 sick-listed due to minor mental disorders *J Occup Rehabil* 2009;**19**:323-332.  
18  
19
- 20 13. Nielsen MBD, Bultmann U, Madsen IEH, *et al.* Health, work, and personal-related predictors  
21  
22 of time to return to work among employees with mental health problems *Disabil Rehabil*  
23  
24 2012;**34**:1311-1316.  
25  
26
- 27 14. Andersen MF, Nielsen KM, Brinkmann S. Meta-synthesis of qualitative research on return to  
28  
29 work among employees with common mental disorders *Scand J Work Environ Health*  
30  
31 2012;**38**:93-104.  
32  
33
- 34 15. Labriola M, Lund T, Christensen KB, Kristensen TS. Multilevel analysis of individual and  
35  
36 contextual factors as predictors of return to work *J Occup Environ Med* 2006;**48**:1181-1188.  
37  
38
- 39 16. Bandura A. Self-efficacy: The exercise of control. New York: WH Freeman, 1997.  
40
- 41 17. Bandura A. Self-efficacy - Toward a Unifying Theory of Behavioral Change *Psychol Rev*  
42  
43 1977;**84**:191-215.  
44  
45
- 46 18. Shaw WS, Reme SE, Linton SJ, Huang Y-H, Pransky G. 3(rd) place, PREMUS best paper  
47  
48 competition: development of the return-to-work self-efficacy (RTWSE-19) questionnaire -  
49  
50 psychometric properties and predictive validity *Scand J Work Environ Health* 2011;**37**:109-  
51  
52 119.  
53  
54  
55  
56  
57  
58  
59  
60

- 1  
2  
3  
4  
5  
6  
7  
8  
9  
10  
11  
12  
13  
14  
15  
16  
17  
18  
19  
20  
21  
22  
23  
24  
25  
26  
27  
28  
29  
30  
31  
32  
33  
34  
35  
36  
37  
38  
39  
40  
41  
42  
43  
44  
45  
46  
47  
48  
49  
50  
51  
52  
53  
54  
55  
56  
57  
58  
59  
60
19. Lagerveld SE, Blonk RWB, Brenninkmeijer V, Schaufeli WB. Return to work among employees with mental health problems: Development and validation of a self-efficacy questionnaire *Work Stress* 2010;**24**:359-375.
  20. Audhoe SS, Hoving JL, Nieuwenhuijsen K, *et al.* Prognostic Factors for the Work Participation of Sick-Listed Unemployed and Temporary Agency Workers with Psychological Problems *J Occup Rehabil* 2012:437-446.
  21. Hoving JL, van der Meer M, Volkova AY, Frings-Dresen MH. Illness perceptions and work participation: a systematic review *Int Arch Occup Environ Health* 2010;**83**:595-605.
  22. Leventhal H, Benyamini Y, Brownlee S, *et al.* Illness representations: Theoretical foundations. In: Weinman JA, Petrie KJ, eds. *Perceptions of Health and Illness*. Amsterdam: Harwood Academic Publishers, 1997; 19 - 47.
  23. Petrie KJ, Broadbent E, Kydd R. Illness perceptions in mental health: Issues and potential applications *J Ment Health* 2008;**17**:559-564.
  24. Løvvik C, Øverland S, Hysing M, Broadbent E, Reme SE. Association Between Illness Perceptions and Return-to-Work Expectations in Workers with Common Mental Health Symptoms *J Occup Rehabil* 2013. Published online first: 18 April 2013  
Doi:10.1007/s10926-013-9439-8
  25. Lagerveld SE, Blonk RWB, Brenninkmeijer V, Wijngaards-de Meij L, Schaufeli WB. Work-Focused Treatment of Common Mental Disorders and Return to Work: A Comparative Outcome Study *J Occup Health Psychol* 2012;**17**:220-234.
  26. Zigmond A, Snaith R. The hospital anxiety and depression scale *Act Psychiatr Scand* 1983;**67**:361-370.

- 1  
2  
3  
4  
5  
6  
7  
8  
9  
10  
11  
12  
13  
14  
15  
16  
17  
18  
19  
20  
21  
22  
23  
24  
25  
26  
27  
28  
29  
30  
31  
32  
33  
34  
35  
36  
37  
38  
39  
40  
41  
42  
43  
44  
45  
46  
47  
48  
49  
50  
51  
52  
53  
54  
55  
56  
57  
58  
59  
60
27. Eriksen HR, Ihlebaek C, Ursin H. A scoring system for subjective health complaints (SHC) *Scand J Public Health* 1999;**27**:63-72.
  28. Broadbent E, Petrie KJ, Main J, Weinman J. The Brief Illness Perception Questionnaire *J Psychosom Res* 2006;**60**:631-637.
  29. Petrie KJ, Cameron LD, Ellis CJ, Buick D, Weinman J. Changing illness perceptions after myocardial infarction: An early intervention randomized controlled trial *Psychosom Med* 2002;**64**:580-586.
  30. Dekkers-Sanchez PM, Wind H, Sluiter JK, Frings-Dresen MHW. A Qualitative Study of Perpetuating Factors for Long-term Sick Leave and Promoting Factors for Return to Work: Chronic Work Disabled Patients in Their Own Words *J Rehabil Med* 2010;**42**:544-552.
  31. Sampere M, Gimeno D, Serra C, *et al.* Return to Work Expectations of Workers on Long-Term Non-Work-Related Sick Leave *J Occup Rehabil* 2012;**22**:15-26.
  32. Nieuwenhuijsen K, Verbeek JH, de Boer AG, Blonk RW, van Dijk FJ. Predicting the duration of sickness absence for patients with common mental disorders in occupational health care *Scand J Work Environ Health* 2006;**32**:67-74.
  33. Mondloch MV, Cole DC, Frank JW. Does how you do depend on how you think you'll do? A systemic review of the evidence for a relation between patients' recovery expectations and health outcomes *CMAJ* 2001;**165**:1303-1303.
  34. D'Amato A, Zijlstra F. Toward a Climate for Work Resumption: The Nonmedical Determinants of Return to Work *J Occup Environ Med* 2010;**52**:67-80.
  35. Cole DC, Mondloch MV, Hogg-Johnson S. Listening to injured workers: how recovery expectations predict outcomes - a prospective study *CMAJ* 2002;**166**:749-754.

- 1  
2  
3 36. Reme SE, Hagen EM, Eriksen HR. Expectations, perceptions, and physiotherapy predict  
4 prolonged sick leave in subacute low back pain *BMC Musculoskelet Disord* 2009;**10**.  
5  
6  
7  
8 37. Haldorsen EMH. Return to work in low back pain patients *Department of Biological and*  
9  
10 *Medical Psychology*. Bergen: University of Bergen, 1998.  
11  
12  
13 38. Nieuwenhuijsen K, Noordik E, van Dijk FJ, van der Klink JJ. Return to Work Perceptions  
14 and Actual Return to Work in Workers with Common Mental Disorders *J Occup Rehabil*  
15 2013;**23**:290-299.  
16  
17  
18  
19  
20 39. Hultin H, Lindholm C, Malfert M, Moller J. Short-term sick leave and future risk of sickness  
21 absence and unemployment - the impact of health status *BMC Public Health* 2012;**12**.  
22  
23  
24  
25  
26  
27  
28  
29  
30  
31  
32  
33  
34  
35  
36  
37  
38  
39  
40  
41  
42  
43  
44  
45  
46  
47  
48  
49  
50  
51  
52  
53  
54  
55  
56  
57  
58  
59  
60



**Expectations and illness perceptions as predictors of benefit  
recipency among workers with common mental disorders:  
secondary analysis from a randomized controlled trial**

|                                 |                                                                                                                                                                                                                                                                                                                                                                            |
|---------------------------------|----------------------------------------------------------------------------------------------------------------------------------------------------------------------------------------------------------------------------------------------------------------------------------------------------------------------------------------------------------------------------|
| Journal:                        | <i>BMJ Open</i>                                                                                                                                                                                                                                                                                                                                                            |
| Manuscript ID:                  | bmjopen-2013-004321.R1                                                                                                                                                                                                                                                                                                                                                     |
| Article Type:                   | Research                                                                                                                                                                                                                                                                                                                                                                   |
| Date Submitted by the Author:   | 20-Jan-2014                                                                                                                                                                                                                                                                                                                                                                |
| Complete List of Authors:       | Løvvik, Camilla; Uni Research, Uni Health<br>Shaw, William; Liberty Mutual, Research Institute for Safety; University of Massachusetts Medical School, Department of Family Medicine and Community Health<br>Øverland, Simon; Norwegian Institute of Public Health, Department of Public Mental Health, Division of Mental Health<br>Reme, Silje; Uni Research, Uni Health |
| <b>Primary Subject Heading</b>: | Mental health                                                                                                                                                                                                                                                                                                                                                              |
| Secondary Subject Heading:      | Rehabilitation medicine, Occupational and environmental medicine, Public health                                                                                                                                                                                                                                                                                            |
| Keywords:                       | MENTAL HEALTH, Adult psychiatry < PSYCHIATRY, PUBLIC HEALTH, REHABILITATION MEDICINE, Human resource management < HEALTH SERVICES ADMINISTRATION & MANAGEMENT, Health policy < HEALTH SERVICES ADMINISTRATION & MANAGEMENT                                                                                                                                                 |
|                                 |                                                                                                                                                                                                                                                                                                                                                                            |

SCHOLARONE™  
Manuscripts

only

1  
2  
3  
4 **EXPECTATIONS AND ILLNESS PERCEPTIONS AS PREDICTORS OF BENEFIT**  
5  
6 **RECIPIENCY AMONG WORKERS WITH COMMON MENTAL DISORDERS:**  
7  
8 **SECONDARY ANALYSIS FROM A RANDOMISED CONTROLLED TRIAL**  
9

10  
11 Correspondence to:

12  
13 Camilla Løvvik

14  
15 Uni Health

16  
17 Uni Health, Uni Research, POB 7810, NO-5020, Bergen, Norway

18  
19 Phone: + 47 55 58 32 68

20  
21 Fax: + 47 55 58 98 78

22  
23 Email: [camilla.lovvik@uni.no](mailto:camilla.lovvik@uni.no)

24  
25  
26  
27  
28 Camilla Løvvik<sup>1</sup>, William Shaw<sup>2,3</sup>, Simon Øverland<sup>4,5</sup>, Silje Endresen Reme<sup>1</sup>

29  
30  
31 <sup>1</sup>Uni Health, Uni Research, Bergen, Norway

32  
33 <sup>2</sup>Liberty Mutual Research Institute for Safety, Hopkinton, Massachusetts, USA

34  
35  
36 <sup>3</sup>Department of Family Medicine and Community Health, University of Massachusetts  
37  
38 Medical School, Worcester, Massachusetts, USA

39  
40  
41 <sup>4</sup> Department of Public Mental Health, Division of Mental Health, Norwegian Institute of  
42  
43 Public Health, Bergen, Norway

44  
45  
46 <sup>5</sup> Department of psychosocial sciences, University of Bergen, Norway  
47  
48  
49  
50  
51  
52  
53

54 *Key words: Common mental disorders, return-to-work expectations, illness perceptions,*  
55  
56 *benefit reciprocity, sick leave,*  
57



1  
2  
3 Word Count: 3945  
4  
5  
6  
7

## 8 **Abstract**

9

### 10 **Objective**

11  
12  
13  
14  
15  
16 Common mental disorders (CMDs) are among the leading causes of sick leave, and more  
17  
18 knowledge on factors related to work participation and return-to-work (RTW) in CMDs is  
19  
20 needed. The aim of this study was to investigate RTW-expectations and illness perceptions as  
21  
22 predictors of benefit recipiency in CMDs.  
23  
24

### 25 **Design**

26  
27  
28  
29  
30 Study participants were enrolled in a randomized controlled trial and reported CMDs as a  
31  
32 main obstacle for work participation. Three pre-specified sub-groups were included: people at  
33  
34 risk of going on sick leave, people on sick leave (>3 weeks), or people on long-term benefits.  
35  
36 Baseline questionnaire data and registry data at baseline and 6 months were used to  
37  
38 investigate predictors of benefit recipiency at 6 months follow-up. Benefit recipiency included  
39  
40 sickness benefits, disability pension, work assessment allowance and unemployment benefits.  
41  
42  
43  
44

### 45 **Results**

46  
47  
48 In this study, uncertain and negative RTW-expectations were strong predictors of benefit  
49  
50 recipiency at 6 months follow-up. Illness perceptions predicted benefit recipiency in the  
51  
52 unadjusted model, but not in the fully adjusted model. In the sub-group on sick leave, both  
53  
54 uncertain and negative RTW-expectations predicted benefit recipiency, while in the sub-group  
55  
56  
57  
58  
59  
60

1  
2  
3 of people at risk of going on sick leave, negative RTW-expectations predicted benefit  
4  
5  
6  
7  
8  
9  
10  
11  
12  
13  
14  
15  
16  
17  
18  
19  
20  
21  
22  
23  
24  
25  
26  
27  
28  
29  
30  
31  
32  
33  
34  
35  
36  
37  
38  
39  
40  
41  
42  
43  
44  
45  
46  
47  
48  
49  
50  
51  
52  
53  
54  
55  
56  
57  
58  
59  
60

of people at risk of going on sick leave, negative RTW-expectations predicted benefit  
reciency. In the sub-group on long-term benefits only female gender predicted benefit  
reciency.

## Conclusion

For people with common mental disorders, uncertain and negative RTW-expectations predict  
later benefit reciency, and expectations seem particularly important for those at risk of or on  
sick leave. For those at risk of sick leave, benefit reciency at follow-up denoted a transition  
onto sick leave or long-term benefit, while those on sick leave had remained so or were  
receiving long-term benefits. Addressing RTW-expectations in occupational health care  
services or vocational rehabilitation might be beneficial in early stages or even prior to a sick  
leave episode.

## Strengths and limitations of this study:

- Our study population consisted of persons at risk of sick leave, currently on sick leave  
or on long-term benefits due to common mental disorders (CMDs). This allowed  
investigation of RTW-expectations and illness perceptions as predictors of future  
benefit reciency across sub-groups on different stages in the transition between work  
and sick leave or long-term benefits.
- Benefit reciency at 6 months follow-up was measured using complete and objective  
data from national registries on sick leave and benefits.
- A version of the Brief Illness Perceptions Questionnaire (B-IPQ) using the generic  
term “your illness” rather than “common mental disorders” (CMDs) was used. Hence,  
participants may have given responses based on illnesses other than CMDs.

- 1  
2  
3  
4  
5  
6  
7  
8  
9  
10  
11  
12  
13  
14  
15  
16  
17  
18  
19  
20  
21  
22  
23  
24  
25  
26  
27  
28  
29  
30  
31  
32  
33  
34  
35  
36  
37  
38  
39  
40  
41  
42  
43  
44  
45  
46  
47  
48  
49  
50  
51  
52  
53  
54  
55  
56  
57  
58  
59  
60
- In this study, RTW-expectations were measured by one single item. Applying more refined and extensive measures could have provided different results regarding the predictive value of RTW-expectations.

For peer review only

## INTRODUCTION

### Background

Work contributes to financial stability and offers a structure to everyday life, possibilities for personal development and social interaction; all factors found to promote good mental health and well-being[1]. Common mental disorders (CMDs) - most often symptoms of anxiety and depression – pose a specific threat to work participation by restricting individuals' employability, reducing functionality, and thereby also negatively affecting income, self-esteem and quality of life[2, 3]. In the UK, CMDs have been found to account for a large proportion of all long-term sick leave[4]. In Norway CMDs account for approximately 20% of sick leave episodes and about one third of all disability pensions[5]. Increased risk for prolonged sick leave[6] and work disability[7] has been found for CMDs, and of those sick listed with CMDs for more than 6 months, only 50% manage to return-to-work (RTW)[8]. A recent study from the U.S. found a lifetime prevalence of 33.7% for any anxiety disorder and 21.4% for any mood disorder [9]. Hence, CMDs potentially affect a large proportion of the working age population. As disability pensions for CMDs on average are awarded at a younger age, the affiliated loss of working years is immense[10]. Thus, CMDs are not only costly for the individual but for the greater society as well. Due to their high prevalence and disabling and potentially catastrophic occupational outcomes, CMDs represent a major challenge to occupational health. To improve RTW in CMDs, as well as help workers struggling with CMDs to maintain their work participation more knowledge about factors acting as barriers for work participation or RTW in CMDs is needed [11].

The volume of studies on what hinders or facilitates work participation in CMDs is growing and findings show that predictors of RTW in CMDs are both wide ranging and many[8, 12, 13]. Factors such as gender, self-rated health status, illness duration, and symptom severity[14] all predict RTW in CMDs. Factors related to work, health risk behaviors, social

1  
2  
3 status as well as medical factors have also been found to act as barriers for RTW after  
4  
5 episodes of poor mental health[8]. In recent years, several studies have pointed out that RTW  
6  
7 following sick leave is a multifaceted and complex process[15, 16].  
8

9  
10 The transition from work to sick leave and from sick leave to disability or back to work, has  
11  
12 been described as a process that require decisions [11]. It is possible that the decision to RTW  
13  
14 is influenced by the individuals' beliefs in his or her ability to attain work related goals.

15  
16 Recent studies have therefore looked at behavior-specific self-efficacy beliefs such as RTW  
17  
18 self-efficacy (RTW-SE)[17] and found this to strongly predict RTW in CMDs[18]. Self-  
19  
20 efficacy, defined as “the belief in ones’ abilities to organize and execute the courses of action  
21  
22 required to produce given attainments”[19] is central to initiation and perseverance of  
23  
24 behavior[20]. Return-to-Work expectations are closely related to RTW–SE, and in a study on  
25  
26 sick-listed temporary agency workers it was found that expecting a full RTW, as well as  
27  
28 perceiving ones’ own health as moderate to good, strongly predicted actual RTW[21]. Both  
29  
30 RTW-expectations and RTW self-efficacy are presumably amendable factors, and it might  
31  
32 prove useful to target these in occupational health care or as part of vocational rehabilitation  
33  
34 interventions. However, in order to successfully do so more information on RTW-  
35  
36 expectations as predictors of work status and what comprises these expectations is needed.  
37  
38

39  
40 In other health conditions such as myocardial infarction and musculoskeletal disorders,  
41  
42 complex psychological constructs such as people’s beliefs about their illness or diagnosis  
43  
44 (“illness perceptions”) have been found to predict RTW[22]. Illness perceptions consist of  
45  
46 cognitive and emotional representations that guide health behaviors and have been suggested  
47  
48 to impact on the transition from disease to health and work-related outcomes[23].  
49

50  
51 Although the relation between illness perceptions and work participation has been  
52  
53 investigated in other health conditions, little is known about the impact these self-regulatory  
54  
55

1  
2  
3 processes have on actual work status in CMDs[22, 24]. To the best of our knowledge, the  
4 impact of illness perceptions on work status in CMDs has not been studied longitudinally.  
5  
6 A recent cross-sectional study of the association between illness perceptions and RTW-  
7 expectations in CMDs found a strong and salient relationship between the two[25].  
8  
9 Maladaptive illness perceptions were associated with uncertain- and negative RTW-  
10 expectations, with stronger associations for the negative RTW-expectations. The findings  
11 further indicate that to understand how illness perceptions and RTW-expectations relate to  
12 each other, and to work related outcomes in CMDs longitudinal designs are necessary [25].  
13  
14 People struggling with work participation due to CMDs may be facing barriers dependent on  
15 situational factors, such as the availability of employment. It is likely that workers *at risk* of  
16 sick leave find themselves in a situation where work participation is more available to them  
17 than to a person who is on sick leave or on long-term benefits, The process of transitioning  
18 between work participation and benefit reciprocity, such as sick leave or long-term benefits, is  
19 likely to involve decisions influenced by a persons' current situation. Thus, a person *at risk of*  
20 *sick leave* will have to decide to maintain work status, while a person *on sick leave* will have  
21 to decide to initiate the RTW-process. A person on long-term benefits may face other  
22 important barriers, such as seeking new employment in addition to being motivated for the  
23 RTW-process. Because of these different situational barriers it is possible that RTW-  
24 expectations and illness perception act differently as predictors of benefit reciprocity.  
25  
26 Although some interventions aiming to increase RTW in CMDs exist[26], there still is a need  
27 for more knowledge concerning specific factors to target and modify in order to continue the  
28 development and improvement of successful RTW-interventions in CMDs.  
29  
30 In keeping with the notion of the transition between work, sick leave and disability as a  
31 process demanding different decisions at different stages, knowing more about how RTW-  
32  
33  
34  
35  
36  
37  
38  
39  
40  
41  
42  
43  
44  
45  
46  
47  
48  
49  
50  
51  
52  
53  
54  
55  
56  
57  
58  
59  
60

1  
2  
3 expectations and illness perceptions act as predictors benefit recipiency across different stages  
4  
5 in this process is important.  
6  
7  
8

## 9 **Objectives**

10  
11 The aim of this study was to examine if RTW-expectations and illness perceptions predicted  
12  
13 benefit recipiency in a population struggling with work participation due to CMDs, and  
14  
15 whether the predictors differed in three pre-specified sub-groups (at risk of sick leave, on sick  
16  
17 leave or on long-term benefits). Based on our previous cross-sectional study[25], we  
18  
19 hypothesized negative RTW-expectations and perceiving severe consequences from illness  
20  
21 could predict receiving benefits 6 months later.  
22  
23

24  
25 This was examined through the specific aims; to i) examine if RTW-expectations and illness  
26  
27 perceptions predicted benefit recipiency 6 months later overall, and further ii) to investigate  
28  
29 the relative predictive contribution of RTW-expectations and illness perceptions after  
30  
31 adjustment for confounders. As a second step, these analyses were repeated for each separate  
32  
33 sub-group defined by baseline work status as the interpretation of results could differ  
34  
35 accordingly.  
36  
37  
38  
39  
40  
41  
42

## 43 **METHODS**

### 44 **Design**

45  
46 The At Work and Coping trial (AWaC) (Trial registration - <http://www.clinicaltrials.gov>,  
47  
48 NCT01146730) is a randomized controlled multicentre trial evaluating the effect of Work-  
49  
50 focused Cognitive Behavioral Therapy (CBT) and an adaptation of Individual Placement and  
51  
52 Support (IPS) on RTW in CMDs. The trial commenced in June 2010 and includes 1193  
53  
54 participants. Participants were referred to the trial from their General Practitioners (GPs) or  
55  
56  
57  
58  
59  
60

1  
2  
3 local national insurance offices, but also by self-referral after receiving information through  
4  
5 websites or advertisement posters in GPs offices. A detailed overview of participant flow and  
6  
7 enrollment has previously been published[25]. In the AWaC trial, an important criterion for  
8  
9 inclusion was the participants' own experience of CMDs as an obstacle for work participation  
10  
11 regardless of actual sick leave status. This was clearly stated in brochures, posters and on  
12  
13 websites. Hence, the AWaC trial included participants self-reporting to be at risk of going on  
14  
15 sick leave, currently on sick leave or on long-term benefits due to CMDs. Additional  
16  
17 inclusion criteria were; age 18 to 60 years, no known severe psychiatric illness, no risk of  
18  
19 suicide or ongoing substance abuse and no current engagement in individual psychotherapy  
20  
21 elsewhere. An explicit willingness to either maintain work participation or return-to-work was  
22  
23 also required.  
24  
25

26  
27 Prior to inclusion, all participants underwent a 30-minute interview where they were screened  
28  
29 for eligibility and given more detailed information about the study. Eligible and willing  
30  
31 participants provided informed consent and filled in the baseline questionnaire. This  
32  
33 questionnaire included various measures on demographic variables and measures on mental  
34  
35 and somatic health complaints. The trial had two arms where the control condition consisted  
36  
37 of usual care, mainly follow-up from GPs, other RTW-interventions or occupational health  
38  
39 care. No effect of the intervention was found on RTW at 6 months follow up. For the purpose  
40  
41 of this study, the groups were not analyzed separately, but group allocation (intervention  
42  
43 versus control) was included as a covariate in the logistic regression models.  
44  
45

46  
47 In the current study, we applied a longitudinal design with 6 months follow-up. Study  
48  
49 procedures were reviewed and approved by The Regional Ethics Committee and all Helsinki  
50  
51 declaration principles were followed.  
52  
53  
54  
55  
56  
57  
58  
59  
60



## Confounders

Instruments measuring health status included the Hospital Anxiety and Depression scale (HAD)[27] for CMDs and the SHC inventory[28] for subjective health complaints. Self-reported health status was measured by one question in the wording “How would you describe your own health?” with answers ranging from “Very good” to “Very poor” on a five point scale. Illness duration was measured by a single item asking participants how long they had had mental health problems (in years). Beliefs concerning the impact of work participation on CMDs were assessed by asking participants “If you continue working, how do you think it will affect your complaints?”. Answers were given on a five point scale ranging from “It will worsen my condition” to “It will be very beneficial”. Participants were also asked if they had signed private disability insurance agreements (yes/no). A Norwegian standard for classification of occupations was used to group self-reported occupational titles into either blue- or white-collar work. This standard complies with the ISCO-88 (COM) standards.

## Predictors

### *Return-to-Work Expectations*

RTW-expectations were assessed by asking participants to respond to the following statement: “I expect to be back at work within the next few weeks”. Thus, for the sub-group at risk of sick leave, the response to this item would imply “maintaining work status”. For the other two sub-groups (on sick leave and on long-term benefits), the response to this item would imply an expectation to RTW. For the purposes of this paper, however, the responses from all participants were labeled “RTW-expectations”. Participants responded on a five point Likert scale (“strongly agree” to “strongly disagree”). Responses were grouped in three comprising those who strongly agreed or agreed into positive RTW-expectations, those

1  
2  
3 answering “neither agree nor disagree” into uncertain RTW-expectations, and those either  
4  
5 disagreeing or strongly disagreeing into negative RTW-expectations.  
6  
7

### 8 9 *Illness perceptions*

10  
11 Illness perceptions were measured using the Brief Illness Perception Questionnaire (B-  
12  
13 IPQ)[29]. This nine-item questionnaire provides a rapid and reliable measurement of illness  
14  
15 perceptions. Items 1 through 8 are rated on a 0-10 response scale. The ninth B-IPQ item is  
16  
17 open-ended and registers attribution of causal mechanisms. All nine items were analyzed  
18  
19 separately in the current study.  
20  
21  
22  
23  
24

### 25 *Outcome*

26  
27 The outcome measure (benefit reciprocity) was based on registry information from complete  
28  
29 and objective national registries on sick leave and benefits. The outcome variable was  
30  
31 dichotomized so that those who at follow-up received any health-related benefit (disability  
32  
33 pension, work assessment allowance, unemployment benefit or sickness benefits) from the  
34  
35 national welfare service were coded “1”, whereas those who did not receive any such benefits  
36  
37 at follow-up were coded “0”.  
38  
39  
40  
41  
42

### 43 **Statistical analysis**

44  
45  
46  
47 First, RTW-expectations and illness perceptions were examined as individual predictors of  
48  
49 benefit reciprocity at 6 months follow-up in the study population as a whole. Thus, these first  
50  
51 analyses included participants at risk of sick leave, currently on sick leave or on long-term  
52  
53 benefits. The illness perception- and RTW-expectation variables were examined as predictors  
54  
55  
56  
57  
58  
59  
60

one at a time, using binary logistic regression analysis. The outcome predicted in all analyses was participants being registered as on sick leave or on long-term benefits.

The item on RTW-expectations was entered as a categorical variable, with positive RTW-expectations as reference category. The confounders were also subjected to the same procedure, and examined as predictors of benefit reciprocity one by one using binary logistic regression. Second, all variables found to significantly predict benefit reciprocity in the unadjusted regression analyses were entered simultaneously in an adjusted regression model. The basic demographic variables gender, age and educational level were included in the adjusted model whether or not these were statistically significant predictors in the unadjusted analysis. The exact same procedure was then repeated in an unadjusted model, followed by an adjusted model stratified on the three pre-specified sub-groups. These analyses were performed to examine illness perceptions and RTW-expectations as predictors of benefit reciprocity in those at risk of sick leave, currently on sick leave or on long-term benefits. All analyses were performed using Statistical package for the social sciences (SPSS) version 19.0.

## RESULTS

### Clinical and demographic characteristics of study population

The study population consisted of more women than men (67.1%), and was characterized by a mean age of 40.4 years and education at university or postgraduate levels (60.5%). More people scored above the clinical cut-off for anxiety (78%) compared to depression (53%) on the HADS questionnaire, and self-reported average illness duration was 8.6 years. In Table 1 we present a full overview of demographic and clinical characteristics, including RTW-expectations and illness perceptions of those at risk of sick leave, on sick leave or on long-term benefits.

Table 1: Baseline demographic and clinical characteristics of participants

|                                                           | Total       | Baseline work-status          |                       |                               | F / $\chi$ |
|-----------------------------------------------------------|-------------|-------------------------------|-----------------------|-------------------------------|------------|
|                                                           |             | At risk of sick leave (n=334) | On sick leave (n=529) | On long-term benefits (n=330) |            |
| Female                                                    | 800 (67.1)  | 197 (16.5)                    | 375 (31.4)            | 228 (19.1)                    | 13.9*      |
| Age                                                       | 40.4 (9.7)  | 40.4 (9.9)                    | 40.3 (9.4)            | 40.5 (9.8)                    | 0.3        |
| University/Postgraduate college                           | 722 (60.5)  | 213 (17.9)                    | 327 (27.5)            | 182 (15.3)                    | 5.5        |
| Blue collar workers (n (%))                               | 391 (33.9)  | 90 (7.8)                      | 166 (14.4)            | 135 (11.7)                    | 16.6*      |
| Private disability insurance (n (%))                      | 294 (26.2)  | 83 (7.4)                      | 147 (13.1)            | 64 (5.7)                      | 7.5*       |
| Beliefs about work and health (1-5) <sup>2</sup>          | 2.9 (1.5)   | 3.2 (1.4)                     | 2.5 (1.4)             | 3.1 (1.5)                     | 22.7*      |
| Illness duration (years)                                  | 8.6 (9.7)   | 8.9 (9.7)                     | 6.5 (8.5)             | 11.6(10.08)                   | 23.8*      |
| Return-to-Work Expectations (n (%))                       |             |                               |                       |                               |            |
| Positive                                                  | 326 (32.3)  | 110 (10.9)                    | 155 (15.4)            | 61 (6.1)                      | 55.3*      |
| Uncertain                                                 | 312 (31.0)  | 63 (6.3)                      | 160 (15.9)            | 89 (8.8)                      | 0.1        |
| Negative                                                  | 370 (36.7)  | 37 (3.7)                      | 197 (19.5)            | 136 (13.5)                    | 48.1*      |
| The Brief-Illness Perception Questionnaire B-IPQ (0 – 10) |             |                               |                       |                               |            |
| Consequences <sup>1</sup>                                 | 7.1 (1.9)   | 6.6 (2.1)                     | 7.2 (1.8)             | 7.3 (1.8)                     | 15.6*      |
| Timeline <sup>1</sup>                                     | 5.9 (2.4)   | 6.0 (2.5)                     | 5.5 (2.3)             | 6.5 (2.5)                     | 16.7*      |
| Personal control                                          | 4.1 (2.2)   | 4.1 (2.2)                     | 4.1 (2.1)             | 4.3 (2.2)                     | 0.6        |
| Treatment control                                         | 6.9 (2.1)   | 6.9 (2.1)                     | 7.0 (2.0)             | 6.6 (2.2)                     | 3.7*       |
| Identity <sup>1</sup>                                     | 6.6 (2.1)   | 6.3 (2.2)                     | 6.6 (2.0)             | 6.9 (2.0)                     | 8.2*       |
| Illness concern <sup>1</sup>                              | 6.5 (2.3)   | 6.3 (2.4)                     | 6.5 (2.3)             | 6.5 (2.2)                     | 0.7        |
| Understanding                                             | 6.2 (2.4)   | 6.0 (2.5)                     | 6.0 (2.4)             | 6.4 (2.5)                     | 2.3        |
| Emotional response <sup>1</sup>                           | 7.7 (2.0)   | 7.6 (2.1)                     | 7.6 (2.0)             | 7.8 (1.9)                     | 1.3        |
| Hospital Anxiety and Depression Scale (HADS)              |             |                               |                       |                               |            |
| Total score                                               | 18.8 (6.9)  | 18.3 (6.8)                    | 19.1 (6.9)            | 18.5 (6.8)                    | 1.6        |
| Anxiety (cut off=>8) (n (%))                              | 926 (78.2)  | 255 (21.5)                    | 421 (35.6)            | 250 (21.1)                    | 2.2        |
| Depression (cut off=>8) (n (%))                           | 633 (53.5)  | 162 (13.7)                    | 294 (24.8)            | 177 (14.9)                    | 4.3        |
| Subjective Health Complaints (SHC)                        |             |                               |                       |                               |            |
| Total score                                               | 20.5 (10.6) | 19.2 (10.4)                   | 20.9 (10.4)           | 21.3(11.1)                    | 4.0*       |
| Self-reported health status (1-5) <sup>3</sup>            | 2.7 (0.8)   | 2.6 (0.8)                     | 2.7 (0.8)             | 2.9 (0.8)                     | 10.9*      |

All data are reported as mean (SD) unless stated otherwise (n (%)).

Significant between-group differences is reported as F-values or  $\chi$  in the final column to the right.

<sup>1</sup>=Higher score indicates more maladaptive illness perceptions

\*=significant at the .05 level

<sup>2</sup>=Higher score indicates perceiving work participation as more beneficial for health (mental health)

<sup>3</sup>=Lower score indicates better self-reported health status

1  
2  
3 **Predictors of benefit reciprocity at 6 months follow-up regardless of work status at**  
4  
5 **baseline**  
6

7 In the study population as a whole, both uncertain and negative RTW-expectations predicted  
8 benefit reciprocity at 6 months follow-up (Table 2). The fully adjusted model showed that  
9 other statistically significant predictors of benefit reciprocity were gender (female), illness  
10 duration (longer) and self-reported health status (moderate to poor). In the unadjusted model,  
11 illness perceptions pertaining to *consequences* (more and severe) and *timeline* (long lasting),  
12 ascribing many experienced symptoms to the illness (*identity*), being concerned about the  
13 illness (*illness concern*), and experiencing emotional distress (*emotional response*), also  
14 predicted benefit reciprocity.  
15  
16  
17  
18  
19  
20  
21  
22  
23  
24  
25  
26  
27  
28  
29  
30  
31  
32  
33  
34  
35  
36  
37  
38  
39  
40  
41  
42  
43  
44  
45  
46  
47  
48  
49  
50  
51  
52  
53  
54  
55  
56  
57  
58  
59  
60

Table 2. Logistic regression results of return-to-work expectations and illness perceptions as predictors of benefit reciprocity at 6 months follow-up in the study population as a whole.

|                                          | Predictor variables                               | Unadjusted model<br>OR (95% CI) | <i>p</i> -value     | Adjusted model<br>OR (95% CI) | <i>p</i> -value  |
|------------------------------------------|---------------------------------------------------|---------------------------------|---------------------|-------------------------------|------------------|
| Basic demographics                       | Gender                                            | 1.18 (0.93 to 1.51)             | 0.171               | 1.55 (1.10 to 2.18)           | 0.011            |
|                                          | Age                                               | 1.00 (0.98 to 1.01)             | 0.963               | 1.00 (0.98 to 1.02)           | 0.529            |
|                                          | Educational level                                 | 0.79 (0.62 to 1.00)             | 0.051               | 0.99 (0.68 to 1.43)           | 0.968            |
| Return-to-work expectations <sup>1</sup> | Uncertain                                         | <b>1.84 (1.33 to 2.53)</b>      | <b>0.001</b>        | <b>2.07 (1.39 to 3.06)</b>    | <b>&lt;0.001</b> |
|                                          | Negative                                          | <b>3.99 (2.91 to 5.47)</b>      | <b>0.001</b>        | <b>3.89 (2.61 to 5.79)</b>    | <b>&lt;0.001</b> |
| Illness Perceptions                      | Consequences                                      | <b>1.17 (1.10 to 1.25)</b>      | <b>&lt;0.001</b>    | 1.11 (0.98 to 1.25)           | 0.078            |
|                                          | Timeline                                          | <b>1.10 (1.05 to 1.16)</b>      | <b>&lt;0.001</b>    | 1.03 (0.95 to 1.11)           | 0.414            |
|                                          | Personal control*                                 | 0.98 (0.93 to 1.03)             | 0.527               |                               |                  |
|                                          | Treatment control*                                | 0.97 (0.91 to 1.02)             | 0.260               |                               |                  |
|                                          | Identity                                          | <b>1.16 (1.09 to 1.22)</b>      | <b>&lt;0.001</b>    | 1.09 (0.98 to 1.21)           | 0.083            |
|                                          | Illness Concern                                   | <b>1.06 (1.01 to 1.11)</b>      | <b>0.017</b>        | 0.97 (0.89 to 1.06)           | 0.977            |
|                                          | Understanding*                                    | 1.00 (0.963 to 1.05)            | 0.713               |                               |                  |
|                                          | Emotional response                                | <b>1.05 (1.00 to 1.12)</b>      | <b>0.049</b>        | 0.90 (0.81 to 1.00)           | 0.066            |
|                                          | Causal attributions                               | Work                            | 0.82 (0.62 to 1.08) | 0.173                         |                  |
| Stress                                   |                                                   | 0.91 (0.62 to 1.32)             | 0.625               |                               |                  |
| Personal relationships                   |                                                   | 0.83 (0.59 to 1.16)             | 0.294               |                               |                  |
| Mental health status                     | HADS total score                                  | <b>1.02 (1.00 to 1.04)</b>      | <b>0.009</b>        | 0.99 (0.96 to 1.02)           | 0.993            |
| Subjective health complaints             | SHC total score                                   | <b>1.02 (1.01 to 1.03)</b>      | <b>&lt;0.001</b>    | 1.00 (0.98 to 1.01)           | 0.975            |
|                                          | Illness duration (in years)                       | <b>1.02 (1.01 to 1.04)</b>      | <b>&lt;0.001</b>    | <b>1.03 (1.01 to 1.05)</b>    | <b>&lt;0.001</b> |
|                                          | Group allocation<br>(intervention vs control)     | 1.03 (0.82 to 1.29)             | 0.774               |                               |                  |
|                                          | Blue-collar workers                               | <b>1.51 (1.18 to 1.93)</b>      | <b>0.001</b>        | 1.44 (0.98 to 2.10)           | 0.057            |
|                                          | Private disability insurance                      | 1.15 (0.88 to 1.50)             | 0.292               |                               |                  |
| Work and health <sup>2</sup> (1-5)       | Work and health <sup>2</sup> (1-5)                | <b>0.89 (0.82 to 0.97)</b>      | <b>0.008</b>        | 0.94 (0.85 to 1.05)           | 0.317            |
|                                          | Self reported health status <sup>3</sup><br>(1-5) | <b>1.43 (1.24 to 1.65)</b>      | <b>&lt;0.001</b>    | <b>1.26 (1.02 to 1.57)</b>    | <b>0.033</b>     |

<sup>1</sup>Reference category: Positive RTW-expectations. <sup>2</sup>Higher score indicates perceiving work as having more positive effects on health. <sup>3</sup>Higher score indicates worse self-reported health status. \*Higher score indicates more adaptive illness perceptions. Significant results are highlighted in bold.

### Predictors of benefit reciprocity in sub-groups

Of those at risk of going on sick leave 264 (79.0%) had managed to maintain their work participation six months later. Return-to-work was experienced by 288 (54.4%) of those on sick leave and by 73 (22.1%) of those on long-term benefits.

#### Group I: At risk of sick leave

For those at risk of going on sick leave, negative RTW-expectations and illness duration (in years) were the only significant predictors of benefit reciprocity at 6 months follow-up in the unadjusted model. In the fully adjusted model, negative RTW-expectations remained the single significant predictor for benefit reciprocity (Table 3).

#### Group II: On sick leave at baseline

In the unadjusted model for those who were on sick leave at baseline, both uncertain and negative RTW-expectations predicted benefit reciprocity at 6 months follow-up. The illness perception components *consequences*, *timeline* and *identity*, were all individual predictors of benefit reciprocity in the unadjusted model. Additionally, self-reported poor health, perceiving work as detrimental for health, higher scores on mental health status (HADS), subjective health complaints (SHC), occupational grade (blue collar work), and lower education were also predictors of benefit reciprocity. In the fully adjusted model only uncertain and negative RTW-expectations remained significant predictors of benefit reciprocity (Table 3).

#### Group III: On long-term benefits at baseline

In those on long-term benefits, only negative RTW-expectations predicted benefit reciprocity in the unadjusted model. In the fully adjusted model negative RTW-expectations was borderline significant ( $p=0.050$ ) while female gender significantly predicted benefit reciprocity (Table 3).

Table 3. Significant predictors of benefit recipiency in adjusted logistic regression models for sub-groups at risk of sick leave (n=334), on sick leave (n=529) or on long-term disability benefits (n=330).

|                                          |                                            | At risk of sick leave*     | On sick leave**            | On long-term benefits***   |
|------------------------------------------|--------------------------------------------|----------------------------|----------------------------|----------------------------|
|                                          |                                            | n=70                       | n=241                      | n=257                      |
| <b>Predictor variables</b>               |                                            | OR (95%CI)                 | OR (95%CI)                 | OR (95%CI)                 |
| Benefit recipiency at 6 months follow-up |                                            |                            |                            |                            |
| Basic demographics                       | Gender                                     | 1.83 (0.89 to 3.78)        | 1.59 (0.99 to 2.56)        | <b>0.37 (0.17 to 0.79)</b> |
|                                          | Age                                        | 0.99 (0.95 to 1.03)        | 0.99 (0.97 to 1.02)        | 0.99 (0.96 to 1.02)        |
|                                          | Educational level                          | 1.06 (0.51 to 2.19)        | 0.71 (0.45 to 1.10)        | 1.46 (0.79 to 2.69)        |
| Return-to-work expectations <sup>2</sup> | Uncertain                                  | 1.92 (0.85 to 4.33)        | <b>2.62 (1.47 to 4.67)</b> | 0.61 (0.28 to 1.30)        |
|                                          | Negative                                   | <b>3.03 (1.22 to 7.53)</b> | <b>3.78 (2.11 to 6.76)</b> | 2.19 (1.00 to 4.79)        |
| Illness Perceptions                      | Consequences                               |                            | 1.10 (0.94 to 1.29)        |                            |
|                                          | Timeline                                   |                            | 1.01 (0.91 to 1.13)        |                            |
|                                          | Personal control*                          |                            |                            |                            |
|                                          | Treatment control*                         |                            |                            |                            |
|                                          | Identity                                   |                            | 1.03 (0.90 to 1.18)        |                            |
|                                          | Illness Concern                            |                            |                            |                            |
|                                          | Understanding*                             |                            |                            |                            |
| Causal attributions                      | Emotional response                         |                            |                            |                            |
|                                          | Work                                       |                            |                            |                            |
|                                          | Stress                                     |                            |                            |                            |
| Mental health status                     | Personal relationships                     |                            |                            |                            |
|                                          | HADS total score                           |                            | 0.99 (0.95 to 1.03)        |                            |
|                                          | Subjective health complaints               |                            | 1.00 (0.98 to 1.03)        |                            |
| Subjective health complaints             | SHC total score                            |                            | 1.00 (0.98 to 1.03)        |                            |
|                                          | Illness duration (in years)                | 1.03 (0.99 to 1.06)        | 1.02 (0.99 to 1.05)        |                            |
|                                          | Group allocation (intervention vs control) |                            |                            |                            |
|                                          | Blue-collar workers                        |                            | 1.09 (0.65 to 1.84)        |                            |
|                                          | Private disability insurance               |                            |                            |                            |



|                                                |                     |
|------------------------------------------------|---------------------|
| Work and health <sup>3</sup> (1-5)             | 0.87 (0.75 to 1.02) |
| Self reported health status <sup>4</sup> (1-5) | 1.24 (0.93 to 1.66) |

<sup>1</sup>Investigated in unadjusted logistic regression models for all three sub-groups, significant predictors carried forward to adjusted models: \*Adjusted for demographic variables gender, age educational level, illness duration and RTW-expectations, \*\*Adjusted for demographic variables gender, age educational level, RTW-expectations, illness perception components *consequences, timeline, identity*, mental health and subjective health complaints, illness duration, occupational grade, beliefs concerning the effect of work on health and self-reported health status \*\*\*Adjusted for demographic variables gender, age educational level and RTW-expectations.

<sup>2</sup>Reference category: Positive RTW-expectations. <sup>3</sup>Higher score indicates perceiving work as having more positive effects on health. <sup>4</sup>Higher score indicates worse self-reported health status. \*Higher score indicates more adaptive illness perceptions. Significant predictors highlighted in bold.

## DISCUSSION

### Main findings

In this study we investigated return-to-work expectations and illness perceptions as predictors of benefit recipiency in people with CMDs struggling with work participation. We further investigated RTW-expectations and illness perceptions as predictors of benefit recipiency in three pre-specified sub-groups based on participants' baseline status; at risk of sick leave, currently on sick leave, or on long-term benefits. Both uncertain and negative RTW-expectations were strong predictors of benefit recipiency in our study population as a whole, as well as in the sub-group of those currently sick-listed. There were differences in the predictive contribution of RTW-expectations and illness perceptions individually and relative to each other depending on participants' baseline status.

#### *Predictors of non-Return to Work*

##### Illness perceptions

Previous studies have shown that illness perceptions predict RTW after myocardial infarction and in musculoskeletal disorders[22, 30]. Furthermore, one study found beliefs about duration and consequences of illness acting as perpetuating factors in long-term sick leave for patients with a variety of disorders[31]. Our findings seem to show some similarities with previous studies. However, in the current study the associations were not maintained in the fully adjusted models.

None of the illness perceptions significantly predicted benefit recipiency in the adjusted model for those on sick leave, whilst uncertain and negative RTW-expectations did. From our previous

1  
2  
3 study, we saw that some of the illness perceptions were particularly strongly associated with the  
4 uncertain and negative RTW-expectations[25]. We therefore find it plausible to assume that  
5  
6 although not statistically significant predictors of benefit reciprocity in this study, illness  
7  
8 perceptions may still be part of the underlying factors comprising RTW-expectations. It appears  
9  
10 intuitively and clinically sound that perceiving ones' illness as having more severe consequences  
11  
12 and affecting more life domains might impact on the RTW-process. One such impact could be  
13  
14 asserted on beliefs or decisions related to work participation, for instance when deciding on  
15  
16 readiness to RTW. Furthermore, believing that illness will last for a longer time is likely to  
17  
18 impact on how a person perceives the future possibilities for work participation, something that  
19  
20 could be involved in the construction and reporting of RTW-expectations. Future studies on  
21  
22 RTW in workers on sick leave with CMDs would benefit from including assessments on illness  
23  
24 perceptions in order to gain more knowledge on the role these psychological processes might  
25  
26 play.  
27  
28  
29  
30  
31  
32  
33  
34  
35  
36

### 37 Return-to-Work Expectations

38 Our findings show that psychological factors such as ones' own uncertain or negative RTW –  
39 expectations are strong predictors of benefit reciprocity in CMDs. This corresponds with  
40  
41 previous research showing RTW-expectations to repeatedly predict actual RTW[32-34].  
42  
43 Previous research findings suggest that health improvement alone is not enough to RTW, and  
44  
45 that psychological factors as well are of importance in RTW [35]. Self-efficacy is essential in the  
46  
47 processes that make us initiate and later sustain our behaviors[20]. Considering RTW-  
48  
49 expectations, these expectations would depend on a persons' belief in the ability to RTW. In our  
50  
51 study, RTW-expectations predicted benefit reciprocity more strongly than symptom severity of  
52  
53  
54  
55  
56

1  
2  
3  
4  
5  
6  
7  
8  
9  
10  
11  
12  
13  
14  
15  
16  
17  
18  
19  
20  
21  
22  
23  
24  
25  
26  
27  
28  
29  
30  
31  
32  
33  
34  
35  
36  
37  
38  
39  
40  
41  
42  
43  
44  
45  
46  
47  
48  
49  
50  
51  
52  
53  
54  
55  
56  
57  
58  
59  
60

CMDs as measured by HADS. This finding is in contrast to one previous study where symptom severity was found to be an important predictor of RTW in a study population resembling the one studied here[13]. This may be due to the simple fact that this previous study did not include RTW-expectations. However, other studies have found symptom severity to predict RTW also when including RTW-expectations [33]. The findings from our study might be due to study population characteristics such as an expressed desire to work or the heterogeneous work status. We therefore suggest that future studies on work participation or RTW in CMDs include systematic evaluation of participants' RTW-expectations.

In our study, negative RTW-expectations predicted benefit reciprocity in those at risk of on sick leave. This subgroup consisted of people not yet on sick leave that self-reported CMDs as an obstacle for work participation. It is likely that those in this sub-group were on the verge of sick leave. This finding stresses the importance of identifying negative RTW-expectations early in cases where CMDs represent a barrier for optimal work participation. In an occupational health care setting including a focus on peoples' RTW-expectations alongside the focus on mental health improvement could be an important factor in preventing future sick-leave episodes and disability resulting from CMDs.

Another important finding of this study was that in those on sick leave, uncertain RTW-expectations predicted benefit reciprocity, although not as strongly as negative RTW-expectations. This corresponds with a previous study where uncertain RTW-expectations were associated with a longer time to RTW in workers with soft tissue injuries, with an even stronger association for negative RTW-expectations [36].

1  
2  
3 A persons' own predictions of time to RTW, as well as RTW-expectations, have been shown to  
4  
5 be better predictors of actual RTW than the opinion of health care professionals[33], and we  
6  
7 therefore suggest that addressing RTW-expectations in occupational health care would be useful.  
8  
9

10  
11  
12 An important characteristic of our study population was that participants' work statuses varied  
13  
14 from "at risk of sick leave" to "on sick leave" and "on long-term benefits". This heterogeneity  
15  
16 allowed for investigation of RTW-expectations and illness perceptions across work status. As a  
17  
18 result we were able to reveal that the predictive value of RTW-expectations may vary dependent  
19  
20 on work status, thus adding to the literature.  
21  
22

23  
24 Further, the B-IPQ, a reliable and rapid measure, was used to assess the participants' illness  
25  
26 perceptions. The use of this measure allowed for comparison with other study populations using  
27  
28 the B-IPQ, and ensured that we measured the participants' actual illness perceptions. The  
29  
30 procedure of a one-item measurement of RTW-expectations has previously been demonstrated to  
31  
32 be sufficient[37] and the single item used to measure RTW-expectations in the present study has  
33  
34 been found to measure important aspects of RTW-expectations in low back pain patients[38].  
35  
36 Additionally, we have previously used this item to investigate the association between illness  
37  
38 perceptions and RTW-expectations within the same study population as in the current study[25].  
39  
40 The use of registry based data to measure RTW secured complete follow-up on all participants  
41  
42 and eliminates common methods problems and is thereby a considerable strength of the study.  
43  
44  
45  
46  
47  
48

49  
50 Selection bias cannot be ruled out as a potential limitation of our study, as those choosing to join  
51  
52 this study could be qualitatively different from those declining to participate. However, as only  
53  
54 17 persons of 1416 screened declined to participate it can be argued that the study population is a  
55  
56

1  
2  
3 representative sample of the help-seeking population struggling with work participation due to  
4  
5  
6 CMDs in Norway.

7  
8 The classification of cases in this study was based on a hierarchical system that separated those  
9  
10 not receiving health related benefits at all from those receiving such benefits whether these were  
11  
12 full or partial. It is possible that a more nuanced classification of cases taking into account partial  
13  
14 benefits such as graded sick leave would yield other results.

15  
16  
17 In this study we used a version of B-IPQ failing to explicitly ask for participants' perceptions of  
18  
19 their CMDs, using the more generic term "your illness". This could represent a limitation to our  
20  
21 study if participants answered the B-IPQ with other illnesses than CMDs in mind. An important  
22  
23 characteristic shared by all participants, however, is that they all enter the study due to CMDs  
24  
25 being the primary reason for their struggles with work participation. Hence, we consider this  
26  
27 potential limitation to be of little importance.

28  
29  
30 Recent studies have shown that differences in RTW self-efficacy are more predictive of RTW  
31  
32 than RTW-expectations[39]. Failing to include extensive measures on RTW self-efficacy in our  
33  
34 study might represent a limitation. However, no extensive RTW self-efficacy measure is as of  
35  
36 yet available in Norwegian language, and we suggest that future studies include such measures  
37  
38 when available.  
39  
40  
41  
42  
43  
44

## 45 **Conclusion**

46  
47 The current study demonstrates that expectations about ones' own future work participation  
48  
49 (RTW-expectations) are strong predictors for future benefit recipiency. Those presenting  
50  
51 uncertain or negative RTW-expectations are more likely be recipients of health related benefits  
52  
53 six months later. We suggest that vocational rehabilitation services and occupational health care  
54  
55  
56

1  
2  
3 services pay attention to RTW-expectations alongside mental health improvement in workers  
4  
5 struggling with work participation due to CMDs.  
6  
7

8 As previous studies have highlighted, “short term sick leave may have consequences for future  
9  
10 sick leave beyond the effect of ill health” [40]. We believe our findings further stress the  
11  
12 importance of identifying negative or uncertain RTW-expectations early on, even before a sick  
13  
14 leave episode occurs.  
15  
16  
17  
18  
19

## 20 **Figure legends**

21  
22 Table 1: Baseline demographic and clinical characteristics of participants  
23

24  
25 Table 2: Logistic regression results of return-to-work expectations and illness perceptions as  
26  
27 predictors of non-RTW at 6 months follow-up regardless of sick leave status at baseline  
28

29  
30 Table 3: Significant predictors of non-RTW in adjusted logistic regression models for subgroups  
31  
32 working, but at risk of sick leave (n=334), on sick leave (n=529) or on long-term disability  
33  
34 benefits (n=330).  
35  
36  
37  
38  
39  
40  
41  
42  
43  
44  
45  
46  
47  
48  
49  
50  
51  
52  
53  
54  
55  
56  
57  
58  
59  
60

## Acknowledgements

This study was funded by the Norwegian Labour and Welfare Administration. Ingrid Blø Olsen contributed to the categorisation of causal attributions on the Brief Illness Perception Questionnaire and categorisation of participants' occupational grade.

## Author contributor statement

CL contributed to data collection, conception and design of the study, performed data analysis, interpreted findings, wrote up the first draft of the study and consequent revisions regarding important intellectual content. WS contributed to critical revision of important intellectual content and revision of analysis. SØ contributed to conception and design of the study, critical revision of the manuscript and its analysis. SER contributed to conception and design of the study, to the first draft of the study and its consequent revisions, and oversaw the revision of the study.

SER is the guarantor of this study.

## Sources of funding and other support

The project was commissioned by the Norwegian Ministry of Health and Ministry of Labour, and financed through the National Strategy on Work and Mental Health (2007-2012). The funder had an active role in the initiation and implementation of the project, but had no role in the analyses of results or the decision to submit the article for publication.

## Data sharing



1  
2  
3 No additional data available.  
4  
5

6 **Competing Interests**  
7

8 None  
9  
10  
11  
12  
13  
14  
15  
16  
17  
18  
19  
20  
21  
22  
23  
24  
25  
26  
27  
28  
29  
30  
31  
32  
33  
34  
35  
36  
37  
38  
39  
40  
41  
42  
43  
44  
45  
46  
47  
48  
49  
50  
51  
52  
53  
54  
55  
56  
57  
58  
59  
60

For peer review only

## References

1. Waddell G, Burton K. Is work good for your health and well-being?, 2006.
2. Dekkers-Sanchez PM, Hoving JL, Sluiter JK, *et al.* Factors associated with long-term sick leave in sick-listed employees: a systematic review *Occupational and Environmental Medicine* 2008;**65**:153-157.
3. Eaton WW, Martins SS, Nestadt G, *et al.* The Burden of Mental Disorders *Epidemiologic Reviews* 2008;**30**:1-14.
4. Stansfeld SA, Fuhrer R, Head J. Impact of common mental disorders on sickness absence in an occupational cohort study *Occupational and Environmental Medicine* 2011;**68**:408-413.
5. Brage S, Nossen JP, Kann IC, *et al.* Sykefravær med diagnose innen psykiske lidelser 2000 - 2011: The Norwegian Welfare and Labour Administration, 2012.
6. Knudsen AK, Harvey SB, Mykletun A, *et al.* Common mental disorders and long-term sickness absence in a general working population. The Hordaland Health Study *Acta Psychiatrica Scandinavica* 2013;**127**:287-297.
7. Knudsen AK, Overland S, Aakvaag HF, *et al.* Common mental disorders and disability pension award: Seven year follow-up of the HUSK study *Journal of Psychosomatic Research* 2010;**69**:59-67.
8. Blank L, Peters J, Pickvance S. A Systematic Review of the Factors which Predict Return to Work for People Suffering Episodes of Poor Mental Health *Journal of Occupational Rehabilitation* 2008;**18**:17-34.
9. Kessler RC, Petukhova M, Sampson NA, *et al.* Twelve-month and lifetime prevalence and lifetime morbid risk of anxiety and mood disorders in the United States *International Journal of Methods in Psychiatric Research* 2012;**21**:169-184.

- 1  
2  
3  
4  
5  
6  
7  
8  
9  
10  
11  
12  
13  
14  
15  
16  
17  
18  
19  
20  
21  
22  
23  
24  
25  
26  
27  
28  
29  
30  
31  
32  
33  
34  
35  
36  
37  
38  
39  
40  
41  
42  
43  
44  
45  
46  
47  
48  
49  
50  
51  
52  
53  
54  
55  
56  
57  
58  
59  
60
10. Knudsen AK, Overland S, Hotopf M, *et al.* Lost Working Years Due to Mental Disorders: An Analysis of the Norwegian Disability Pension Registry *Plos One* 2012;**7**.
  11. Henderson M, Harvey SB, Overland S, *et al.* Work and common psychiatric disorders *Journal of the Royal Society of Medicine* 2011;**104**:198-207.
  12. Cornelius LR, van der Klink JJJ, Groothoff JW, *et al.* Prognostic Factors of Long Term Disability Due to Mental Disorders: A Systematic Review *Journal of Occupational Rehabilitation* 2011;**21**:259-274.
  13. Brouwers EP, Terluin B, Tiemens BG, *et al.* Predicting return to work in employees sick-listed due to minor mental disorders *Journal of Occupational Rehabilitation* 2009;**19**:323-332.
  14. Nielsen MBD, Bultmann U, Madsen IEH, *et al.* Health, work, and personal-related predictors of time to return to work among employees with mental health problems *Disability and Rehabilitation* 2012;**34**:1311-1316.
  15. Andersen MF, Nielsen KM, Brinkmann S. Meta-synthesis of qualitative research on return to work among employees with common mental disorders *Scandinavian Journal of Work Environment & Health* 2012;**38**:93-104.
  16. Labriola M, Lund T, Christensen KB, *et al.* Multilevel analysis of individual and contextual factors as predictors of return to work *Journal of occupational and environmental medicine / American College of Occupational and Environmental Medicine* 2006;**48**:1181-1188.
  17. Shaw WS, Reme SE, Linton SJ, *et al.* 3(rd) place, PREMUS best paper competition: development of the return-to-work self-efficacy (RTWSE-19) questionnaire - psychometric properties and predictive validity *Scandinavian Journal of Work Environment & Health* 2011;**37**:109-119.

- 1  
2  
3  
4  
5  
6  
7  
8  
9  
10  
11  
12  
13  
14  
15  
16  
17  
18  
19  
20  
21  
22  
23  
24  
25  
26  
27  
28  
29  
30  
31  
32  
33  
34  
35  
36  
37  
38  
39  
40  
41  
42  
43  
44  
45  
46  
47  
48  
49  
50  
51  
52  
53  
54  
55  
56  
57  
58  
59  
60
18. Lagerveld SE, Blonk RWB, Brenninkmeijer V, *et al.* Return to work among employees with mental health problems: Development and validation of a self-efficacy questionnaire *Work and Stress* 2010;**24**:359-375.
  19. Bandura A. Self-efficacy: The exercise of control. New York: WH Freeman, 1997.
  20. Bandura A. Self-efficacy - Toward a Unifying Theory of Behavioral Change *Psychological Review* 1977;**84**:191-215.
  21. Audhoe SS, Hoving JL, Nieuwenhuijsen K, *et al.* Prognostic Factors for the Work Participation of Sick-Listed Unemployed and Temporary Agency Workers with Psychological Problems *Journal of Occupational Rehabilitation* 2012:437-446.
  22. Hoving JL, van der Meer M, Volkova AY, *et al.* Illness perceptions and work participation: a systematic review *International archives of occupational and environmental health* 2010;**83**:595-605.
  23. Leventhal H, Benyamini Y, Brownlee S, *et al.* Illness representations: Theoretical foundations. In: Weinman JA, Petrie KJ, eds. *Perceptions of Health and Illness*. Amsterdam: Harwood Academic Publishers, 1997; 19 - 47.
  24. Petrie KJ, Broadbent E, Kydd R. Illness perceptions in mental health: Issues and potential applications *Journal of Mental Health* 2008;**17**:559-564.
  25. Løvvik C, Øverland S, Hysing M, *et al.* Association Between Illness Perceptions and Return-to-Work Expectations in Workers with Common Mental Health Symptoms *Journal of Occupational Rehabilitation* 2013.
  26. Lagerveld SE, Blonk RWB, Brenninkmeijer V, *et al.* Work-Focused Treatment of Common Mental Disorders and Return to Work: A Comparative Outcome Study *Journal of Occupational Health Psychology* 2012;**17**:220-234.

- 1  
2  
3  
4  
5  
6  
7  
8  
9  
10  
11  
12  
13  
14  
15  
16  
17  
18  
19  
20  
21  
22  
23  
24  
25  
26  
27  
28  
29  
30  
31  
32  
33  
34  
35  
36  
37  
38  
39  
40  
41  
42  
43  
44  
45  
46  
47  
48  
49  
50  
51  
52  
53  
54  
55  
56  
57  
58  
59  
60
27. Zigmond A, Snaith R. The hospital anxiety and depression scale *Acta Psychiatrica Scandinavica* 1983;**67**:361-370.
28. Eriksen HR, Ihlebaek C, Ursin H. A scoring system for subjective health complaints (SHC) *Scandinavian Journal of Public Health* 1999;**27**:63-72.
29. Broadbent E, Petrie KJ, Main J, et al. The Brief Illness Perception Questionnaire *Journal of Psychosomatic Research* 2006;**60**:631-637.
30. Petrie KJ, Cameron LD, Ellis CJ, et al. Changing illness perceptions after myocardial infarction: An early intervention randomized controlled trial *Psychosomatic Medicine* 2002;**64**:580-586.
31. Dekkers-Sanchez PM, Wind H, Sluiter JK, et al. A Qualitative Study of Perpetuating Factors for Long-term Sick Leave and Promoting Factors for Return to Work: Chronic Work Disabled Patients in Their Own Words *Journal of Rehabilitation Medicine* 2010;**42**:544-552.
32. Sampere M, Gimeno D, Serra C, et al. Return to Work Expectations of Workers on Long-Term Non-Work-Related Sick Leave *Journal of Occupational Rehabilitation* 2012;**22**:15-26.
33. Nieuwenhuijsen K, Verbeek JH, de Boer AG, et al. Predicting the duration of sickness absence for patients with common mental disorders in occupational health care *Scandinavian Journal of Work Environment & Health* 2006;**32**:67-74.
34. Mondloch MV, Cole DC, Frank JW. Does how you do depend on how you think you'll do? A systemic review of the evidence for a relation between patients' recovery expectations and health outcomes (vol 165, 174, 2001) *Canadian Medical Association Journal* 2001;**165**:1303-1303.

- 1  
2  
3 35. D'Amato A, Zijlstra F. Toward a Climate for Work Resumption: The Nonmedical  
4  
5 Determinants of Return to Work *Journal of Occupational and Environmental Medicine*  
6  
7 2010;**52**:67-80.  
8  
9
- 10 36. Cole DC, Mondloch MV, Hogg-Johnson S. Listening to injured workers: how recovery  
11  
12 expectations predict outcomes - a prospective study *Canadian Medical Association Journal*  
13  
14 2002;**166**:749-754.  
15  
16
- 17 37. Reme SE, Hagen EM, Eriksen HR. Expectations, perceptions, and physiotherapy predict  
18  
19 prolonged sick leave in subacute low back pain *Bmc Musculoskeletal Disorders* 2009;**10**.  
20  
21
- 22 38. Haldorsen EMH. Return to work in low back pain patients *Department of Biological and*  
23  
24 *Medical Psychology*. Bergen: University of Bergen, 1998.  
25  
26
- 27 39. Nieuwenhuijsen K, Noordik E, van Dijk FJ, et al. Return to Work Perceptions and Actual  
28  
29 Return to Work in Workers with Common Mental Disorders *Journal of Occupational*  
30  
31 *Rehabilitation* 2013;**23**:290-299.  
32  
33
- 34 40. Hultin H, Lindholm C, Malfert M, et al. Short-term sick leave and future risk of sickness  
35  
36 absence and unemployment - the impact of health status *BMC public health* 2012;**12**.  
37  
38  
39  
40  
41  
42  
43  
44  
45  
46  
47  
48  
49  
50  
51  
52  
53  
54  
55  
56  
57  
58  
59  
60

1  
2  
3  
4 **EXPECTATIONS AND ILLNESS PERCEPTIONS AS PREDICTORS OF BENEFIT**  
5  
6 **RECIPIENCY AMONG WORKERS WITH COMMON MENTAL DISORDERS:**  
7  
8 **SECONDARY ANALYSIS FROM A RANDOMISED CONTROLLED TRIAL**  
9

10  
11 Correspondence to:

12 Camilla Løvvik

13 Uni Health

14  
15 Uni Health, Uni Research, POB 7810, NO-5020, Bergen, Norway

16  
17 Phone: + 47 55 58 32 68

18  
19 Fax: + 47 55 58 98 78

20  
21 Email: [camilla.lovvik@uni.no](mailto:camilla.lovvik@uni.no)  
22  
23

24  
25  
26  
27  
28 Camilla Løvvik<sup>1</sup>, William Shaw<sup>2,3</sup>, Simon Øverland<sup>4,5</sup>, Silje Endresen Reme<sup>1</sup>  
29

30  
31 <sup>1</sup>Uni Health, Uni Research, Bergen, Norway  
32

33  
34 <sup>2</sup>Liberty Mutual Research Institute for Safety, Hopkinton, Massachusetts, USA  
35

36  
37 <sup>3</sup>Department of Family Medicine and Community Health, University of Massachusetts  
38  
39 Medical School, Worcester, Massachusetts, USA  
40

41  
42 <sup>4</sup> Department of Public Mental Health, Division of Mental Health, Norwegian Institute of  
43  
44 Public Health, Bergen, Norway  
45

46  
47 <sup>5</sup> Department of psychosocial sciences, University of Bergen, Norway  
48  
49  
50  
51  
52  
53

54  
55 *Key words: Common mental disorders, return-to-work expectations, illness perceptions,*  
56  
57 *benefit reciprocity, sick leave,*  
58

1  
2  
3 Word Count: 3945  
4  
5  
6  
7  
8  
9

## 10 Abstract

### 11 Objective

12  
13  
14  
15  
16  
17  
18 Common mental disorders (CMDs) are among the leading causes of sick leave, and more  
19  
20 knowledge on factors related to work participation and return-to-work (RTW) in CMDs is  
21  
22 needed. The aim of this study was to investigate RTW-expectations and illness perceptions as  
23  
24 predictors of benefit recipiency in CMDs.  
25  
26  
27

### 28 Design

29  
30  
31  
32 Study participants were enrolled in a randomized controlled trial and reported CMDs as a  
33  
34 main obstacle for work participation. Three pre-specified sub-groups were included: people at  
35  
36 risk of going on sick leave, people on sick leave (>3 weeks), or people on long-term benefits.  
37  
38 Baseline questionnaire data and registry data at baseline and 6 months were used to  
39  
40 investigate predictors of benefit recipiency at 6 months follow-up. Benefit recipiency included  
41  
42 sickness benefits, disability pension, work assessment allowance and unemployment benefits.  
43  
44  
45  
46  
47

### 48 Results

49  
50 In this study, uncertain and negative RTW-expectations were strong predictors of benefit  
51  
52 recipiency at 6 months follow-up. Illness perceptions predicted benefit recipiency in the  
53  
54 unadjusted model, but not in the fully adjusted model. In the sub-group on sick leave, both  
55  
56 uncertain and negative RTW-expectations predicted benefit recipiency, while in the sub-group  
57  
58  
59  
60



1  
2  
3 of people at risk of going on sick leave, negative RTW-expectations predicted benefit  
4  
5 recipiency. In the sub-group on long-term benefits only female gender predicted benefit  
6  
7 recipiency.  
8  
9

## 10 11 12 **Conclusion**

13  
14 For people with common mental disorders, uncertain and negative RTW-expectations predict  
15  
16 later benefit recipiency, and expectations seem particularly important for those at risk of or on  
17  
18 sick leave. For those at risk of sick leave, benefit recipiency at follow-up denoted a transition  
19  
20 onto sick leave or long-term benefit, while those on sick leave had remained so or were  
21  
22 receiving long-term benefits. Addressing RTW-expectations in occupational health care  
23  
24 services or vocational rehabilitation might be beneficial in early stages or even prior to a sick  
25  
26 leave episode.  
27  
28  
29  
30  
31

## 32 **Strengths and limitations of this study:**

- 33  
34  
35 • Our study population consisted of persons at risk of sick leave, currently on sick leave  
36  
37 or on long-term benefits due to common mental disorders (CMDs). This allowed  
38  
39 investigation of RTW-expectations and illness perceptions as predictors of future  
40  
41 benefit recipiency across sub-groups on different stages in the transition between work  
42  
43 and sick leave or long-term benefits.  
44
- 45  
46 • Benefit recipiency at 6 months follow-up was measured using complete and objective  
47  
48 data from national registries on sick leave and benefits.  
49
- 50  
51 • A version of the Brief Illness Perceptions Questionnaire (B-IPQ) using the generic  
52  
53 term “your illness” rather than “common mental disorders” (CMDs) was used. Hence,  
54  
55 participants may have given responses based on illnesses other than CMDs.  
56  
57

1  
2  
3  
4  
5  
6  
7  
8  
9  
10  
11  
12  
13  
14  
15  
16  
17  
18  
19  
20  
21  
22  
23  
24  
25  
26  
27  
28  
29  
30  
31  
32  
33  
34  
35  
36  
37  
38  
39  
40  
41  
42  
43  
44  
45  
46  
47  
48  
49  
50  
51  
52  
53  
54  
55  
56  
57  
58  
59  
60

- In this study, RTW-expectations were measured by one single item. Applying more refined and extensive measures could have provided different results regarding the predictive value of RTW-expectations.

For peer review only

## INTRODUCTION

### Background

Work contributes to financial stability and offers a structure to everyday life, possibilities for personal development and social interaction; all factors found to promote good mental health and well-being[1]. Common mental disorders (CMDs) - most often symptoms of anxiety and depression – pose a specific threat to work participation by restricting individuals' employability, reducing functionality, and thereby also negatively affecting income, self-esteem and quality of life[2, 3]. In the UK, CMDs have been found to account for a large proportion of all long-term sick leave[4]. In Norway CMDs account for approximately 20% of sick leave episodes and about one third of all disability pensions[5]. Increased risk for prolonged sick leave[6] and work disability[7] has been found for CMDs, and of those sick listed with CMDs for more than 6 months, only 50% manage to return-to-work (RTW)[8]. A recent study from the U.S. found a lifetime prevalence of 33.7% for any anxiety disorder and 21.4% for any mood disorder [9]. Hence, CMDs potentially affect a large proportion of the working age population. As disability pensions for CMDs on average are awarded at a younger age, the affiliated loss of working years is immense[10]. Thus, CMDs are not only costly for the individual but for the greater society as well. Due to their high prevalence and disabling and potentially catastrophic occupational outcomes, CMDs represent a major challenge to occupational health. To improve RTW in CMDs, as well as help workers struggling with CMDs to maintain their work participation more knowledge about factors acting as barriers for work participation or RTW in CMDs is needed [11].

The volume of studies on what hinders or facilitates work participation in CMDs is growing and findings show that predictors of RTW in CMDs are both wide ranging and many[8, 12, 13]. Factors such as gender, self-rated health status, illness duration, and symptom severity[14] all predict RTW in CMDs. Factors related to work, health risk behaviors, social

1  
2  
3 status as well as medical factors have also been found to act as barriers for RTW after  
4  
5 episodes of poor mental health[8]. In recent years, several studies have pointed out that RTW  
6  
7 following sick leave is a multifaceted and complex process[15, 16].  
8

9  
10 The transition from work to sick leave and from sick leave to disability or back to work, has  
11  
12 been described as a process that require decisions [11]. It is possible that the decision to RTW  
13  
14 is influenced by the individuals' beliefs in his or her ability to attain work related goals.  
15

16 Recent studies have therefore looked at behavior-specific self-efficacy beliefs such as RTW  
17  
18 self-efficacy (RTW-SE)[17] and found this to strongly predict RTW in CMDs[18]. Self-  
19  
20 efficacy, defined as "the belief in ones' abilities to organize and execute the courses of action  
21  
22 required to produce given attainments"[19] is central to initiation and perseverance of  
23  
24 behavior[20]. Return-to-Work expectations are closely related to RTW-SE, and in a study on  
25  
26 sick-listed temporary agency workers it was found that expecting a full RTW, as well as  
27  
28 perceiving ones' own health as moderate to good, strongly predicted actual RTW[21]. Both  
29  
30 RTW-expectations and RTW self-efficacy are presumably amendable factors, and it might  
31  
32 prove useful to target these in occupational health care or as part of vocational rehabilitation  
33  
34 interventions. However, in order to successfully do so more information on RTW-  
35  
36 expectations as predictors of work status and what comprises these expectations is needed.  
37  
38

39  
40 In other health conditions such as myocardial infarction and musculoskeletal disorders,  
41  
42 complex psychological constructs such as people's beliefs about their illness or diagnosis  
43  
44 ("illness perceptions") have been found to predict RTW[22]. Illness perceptions consist of  
45  
46 cognitive and emotional representations that guide health behaviors and have been suggested  
47  
48 to impact on the transition from disease to health and work-related outcomes[23].  
49

50  
51 Although the relation between illness perceptions and work participation has been  
52  
53 investigated in other health conditions, little is known about the impact these self-regulatory  
54  
55

1  
2  
3 processes have on actual work status in CMDs[22, 24]. To the best of our knowledge, the  
4  
5 impact of illness perceptions on work status in CMDs has not been studied longitudinally.

6  
7 A recent cross-sectional study of the association between illness perceptions and RTW-  
8  
9 expectations in CMDs found a strong and salient relationship between the two[25].

10  
11 Maladaptive illness perceptions were associated with uncertain- and negative RTW-  
12  
13 expectations, with stronger associations for the negative RTW-expectations. The findings  
14  
15 further indicate that to understand how illness perceptions and RTW-expectations relate to  
16  
17 each other, and to work related outcomes in CMDs longitudinal designs are necessary [25].

18  
19  
20 People struggling with work participation due to CMDs may be facing barriers dependent on  
21  
22 situational factors, such as the availability of employment. It is likely that workers *at risk* of  
23  
24 sick leave find themselves in a situation where work participation is more available to them  
25  
26 than to a person who is on sick leave or on long-term benefits, The process of transitioning  
27  
28 between work participation and benefit reciprocity, such as sick leave or long-term benefits, is  
29  
30 likely to involve decisions influenced by a persons' current situation. Thus, a person *at risk of*  
31  
32 *sick leave* will have to decide to maintain work status, while a person *on sick leave* will have  
33  
34 to decide to initiate the RTW-process. A person on long-term benefits may face other  
35  
36 important barriers, such as seeking new employment in addition to being motivated for the  
37  
38 RTW-process. Because of these different situational barriers it is possible that RTW-  
39  
40 expectations and illness perception act differently as predictors of benefit reciprocity.  
41  
42  
43  
44

45 Although some interventions aiming to increase RTW in CMDs exist[26], there still is a need  
46  
47 for more knowledge concerning specific factors to target and modify in order to continue the  
48  
49 development and improvement of successful RTW-interventions in CMDs.

50  
51 In keeping with the notion of the transition between work, sick leave and disability as a  
52  
53 process demanding different decisions at different stages, knowing more about how RTW-  
54  
55

1  
2  
3 expectations and illness perceptions act as predictors benefit reciprocity across different stages  
4  
5 in this process is important.  
6  
7  
8

## 9 10 **Objectives**

11 The aim of this study was to examine if RTW-expectations and illness perceptions predicted  
12 benefit reciprocity in a population struggling with work participation due to CMDs, and  
13 whether the predictors differed in three pre-specified sub-groups (at risk of sick leave, on sick  
14 leave or on long-term benefits). Based on our previous cross-sectional study[25], we  
15  
16 hypothesized negative RTW-expectations and perceiving severe consequences from illness  
17  
18 could predict receiving benefits 6 months later.  
19  
20  
21  
22  
23  
24

25 This was examined through the specific aims; to i) examine if RTW-expectations and illness  
26 perceptions predicted benefit reciprocity 6 months later overall, and further ii) to investigate  
27 the relative predictive contribution of RTW-expectations and illness perceptions after  
28 adjustment for confounders. As a second step, these analyses were repeated for each separate  
29 sub-group defined by baseline work status as the interpretation of results could differ  
30 accordingly.  
31  
32  
33  
34  
35  
36  
37  
38  
39  
40  
41  
42

## 43 **METHODS**

### 44 **Design**

45 The At Work and Coping trial (AWaC) (Trial registration - <http://www.clinicaltrials.gov>,  
46 NCT01146730) is a randomized controlled multicentre trial evaluating the effect of Work-  
47 focused Cognitive Behavioral Therapy (CBT) and an adaptation of Individual Placement and  
48 Support (IPS) on RTW in CMDs. The trial commenced in June 2010 and includes 1193  
49  
50 participants. Participants were referred to the trial from their General Practitioners (GPs) or  
51  
52  
53  
54  
55  
56  
57  
58  
59  
60

1  
2  
3 local national insurance offices, but also by self-referral after receiving information through  
4  
5 websites or advertisement posters in GPs offices. A detailed overview of participant flow and  
6  
7 enrollment has previously been published[25]. In the AWaC trial, an important criterion for  
8  
9 inclusion was the participants' own experience of CMDs as an obstacle for work participation  
10  
11 regardless of actual sick leave status. This was clearly stated in brochures, posters and on  
12  
13 websites. Hence, the AWaC trial included participants self-reporting to be at risk of going on  
14  
15 sick leave, currently on sick leave or on long-term benefits due to CMDs. Additional  
16  
17 inclusion criteria were; age 18 to 60 years, no known severe psychiatric illness, no risk of  
18  
19 suicide or ongoing substance abuse and no current engagement in individual psychotherapy  
20  
21 elsewhere. An explicit willingness to either maintain work participation or return-to-work was  
22  
23 also required.  
24  
25

26  
27 Prior to inclusion, all participants underwent a 30-minute interview where they were screened  
28  
29 for eligibility and given more detailed information about the study. Eligible and willing  
30  
31 participants provided informed consent and filled in the baseline questionnaire. This  
32  
33 questionnaire included various measures on demographic variables and measures on mental  
34  
35 and somatic health complaints. The trial had two arms where the control condition consisted  
36  
37 of usual care, mainly follow-up from GPs, other RTW-interventions or occupational health  
38  
39 care. No effect of the intervention was found on RTW at 6 months follow up. For the purpose  
40  
41 of this study, the groups were not analyzed separately, but group allocation (intervention  
42  
43 versus control) was included as a covariate in the logistic regression models.  
44  
45

46  
47 In the current study, we applied a longitudinal design with 6 months follow-up. Study  
48  
49 procedures were reviewed and approved by The Regional Ethics Committee and all Helsinki  
50  
51 declaration principles were followed.  
52  
53  
54  
55  
56  
57  
58  
59  
60

## Confounders

Instruments measuring health status included the Hospital Anxiety and Depression scale (HAD)[27] for CMDs and the SHC inventory[28] for subjective health complaints. Self-reported health status was measured by one question in the wording “How would you describe your own health?” with answers ranging from “Very good” to “Very poor” on a five point scale. Illness duration was measured by a single item asking participants how long they had had mental health problems (in years). Beliefs concerning the impact of work participation on CMDs were assessed by asking participants “If you continue working, how do you think it will affect your complaints?”. Answers were given on a five point scale ranging from “It will worsen my condition” to “It will be very beneficial”. Participants were also asked if they had signed private disability insurance agreements (yes/no). A Norwegian standard for classification of occupations was used to group self-reported occupational titles into either blue- or white-collar work. This standard complies with the ISCO-88 (COM) standards.

## Predictors

### *Return-to-Work Expectations*

RTW-expectations were assessed by asking participants to respond to the following statement: “I expect to be back at work within the next few weeks”. Thus, for the sub-group at risk of sick leave, the response to this item would imply “maintaining work status”. For the other two sub-groups (on sick leave and on long-term benefits), the response to this item would imply an expectation to RTW. For the purposes of this paper, however, the responses from all participants were labeled “RTW-expectations”. Participants responded on a five point Likert scale (“strongly agree” to “strongly disagree”). Responses were grouped in three comprising those who strongly agreed or agreed into positive RTW-expectations, those



1  
2  
3 answering “neither agree nor disagree” into uncertain RTW-expectations, and those either  
4  
5 disagreeing or strongly disagreeing into negative RTW-expectations.  
6  
7

### 8 9 *Illness perceptions*

10  
11 Illness perceptions were measured using the Brief Illness Perception Questionnaire (B-  
12  
13 IPQ)[29]. This nine-item questionnaire provides a rapid and reliable measurement of illness  
14  
15 perceptions. Items 1 through 8 are rated on a 0-10 response scale. The ninth B-IPQ item is  
16  
17 open-ended and registers attribution of causal mechanisms. All nine items were analyzed  
18  
19 separately in the current study.  
20  
21  
22  
23  
24

### 25 Outcome

26  
27 The outcome measure (benefit reciprocity) was based on registry information from complete  
28  
29 and objective national registries on sick leave and benefits. The outcome variable was  
30  
31 dichotomized so that those who at follow-up received any health-related benefit (disability  
32  
33 pension, work assessment allowance, unemployment benefit or sickness benefits) from the  
34  
35 national welfare service were coded “1”, whereas those who did not receive any such benefits  
36  
37 at follow-up were coded “0”.  
38  
39  
40  
41

### 42 **Statistical analysis**

43  
44  
45  
46  
47 First, RTW-expectations and illness perceptions were examined as individual predictors of  
48  
49 benefit reciprocity at 6 months follow-up in the study population as a whole. Thus, these first  
50  
51 analyses included participants at risk of sick leave, currently on sick leave or on long-term  
52  
53 benefits. The illness perception- and RTW-expectation variables were examined as predictors  
54  
55  
56  
57  
58  
59  
60

1  
2  
3 one at a time, using binary logistic regression analysis. The outcome predicted in all analyses  
4  
5 was participants being registered as on sick leave or on long-term benefits.  
6  
7 The item on RTW-expectations was entered as a categorical variable, with positive RTW-  
8  
9 expectations as reference category. The confounders were also subjected to the same  
10  
11 procedure, and examined as predictors of benefit reciprocity one by one using binary logistic  
12  
13 regression. Second, all variables found to significantly predict benefit reciprocity in the  
14  
15 unadjusted regression analyses were entered simultaneously in an adjusted regression model.  
16  
17 The basic demographic variables gender, age and educational level were included in the  
18  
19 adjusted model whether or not these were statistically significant predictors in the unadjusted  
20  
21 analysis. The exact same procedure was then repeated in an unadjusted model, followed by an  
22  
23 adjusted model stratified on the three pre-specified sub-groups. These analyses were  
24  
25 performed to examine illness perceptions and RTW-expectations as predictors of benefit  
26  
27 reciprocity in those at risk of sick leave, currently on sick leave or on long-term benefits. All  
28  
29 analyses were performed using Statistical package for the social sciences (SPSS) version 19.0.  
30  
31  
32  
33  
34  
35

## 36 RESULTS

### 37 Clinical and demographic characteristics of study population

38  
39 The study population consisted of more women than men (67.1%), and was characterized by a  
40  
41 mean age of 40.4 years and education at university or postgraduate levels (60.5%). More  
42  
43 people scored above the clinical cut-off for anxiety (78%) compared to depression (53%) on  
44  
45 the HADS questionnaire, and self-reported average illness duration was 8.6 years. In Table 1  
46  
47 we present a full overview of demographic and clinical characteristics, including RTW-  
48  
49 expectations and illness perceptions of those at risk of sick leave, on sick leave or on long-  
50  
51 term benefits.  
52  
53  
54  
55  
56  
57  
58  
59  
60

Table 1: Baseline demographic and clinical characteristics of participants

|                                                           | Total       | Baseline work-status          |                       |                               | F / $\chi$ |
|-----------------------------------------------------------|-------------|-------------------------------|-----------------------|-------------------------------|------------|
|                                                           |             | At risk of sick leave (n=334) | On sick leave (n=529) | On long-term benefits (n=330) |            |
| Female                                                    | 800 (67.1)  | 197 (16.5)                    | 375 (31.4)            | 228 (19.1)                    | 13.9*      |
| Age                                                       | 40.4 (9.7)  | 40.4 (9.9)                    | 40.3 (9.4)            | 40.5 (9.8)                    | 0.3        |
| University/Postgraduate college                           | 722 (60.5)  | 213 (17.9)                    | 327 (27.5)            | 182 (15.3)                    | 5.5        |
| Blue collar workers (n (%))                               | 391 (33.9)  | 90 (7.8)                      | 166 (14.4)            | 135 (11.7)                    | 16.6*      |
| Private disability insurance (n (%))                      | 294 (26.2)  | 83 (7.4)                      | 147 (13.1)            | 64 (5.7)                      | 7.5*       |
| Beliefs about work and health (1-5) <sup>2</sup>          | 2.9 (1.5)   | 3.2 (1.4)                     | 2.5 (1.4)             | 3.1 (1.5)                     | 22.7*      |
| Illness duration (years)                                  | 8.6 (9.7)   | 8.9 (9.7)                     | 6.5 (8.5)             | 11.6(10.08)                   | 23.8*      |
| Return-to-Work Expectations (n (%))                       |             |                               |                       |                               |            |
| Positive                                                  | 326 (32.3)  | 110 (10.9)                    | 155 (15.4)            | 61 (6.1)                      | 55.3*      |
| Uncertain                                                 | 312 (31.0)  | 63 (6.3)                      | 160 (15.9)            | 89 (8.8)                      | 0.1        |
| Negative                                                  | 370 (36.7)  | 37 (3.7)                      | 197 (19.5)            | 136 (13.5)                    | 48.1*      |
| The Brief-Illness Perception Questionnaire B-IPQ (0 – 10) |             |                               |                       |                               |            |
| Consequences <sup>1</sup>                                 | 7.1 (1.9)   | 6.6 (2.1)                     | 7.2 (1.8)             | 7.3 (1.8)                     | 15.6*      |
| Timeline <sup>1</sup>                                     | 5.9 (2.4)   | 6.0 (2.5)                     | 5.5 (2.3)             | 6.5 (2.5)                     | 16.7*      |
| Personal control                                          | 4.1 (2.2)   | 4.1 (2.2)                     | 4.1 (2.1)             | 4.3 (2.2)                     | 0.6        |
| Treatment control                                         | 6.9 (2.1)   | 6.9 (2.1)                     | 7.0 (2.0)             | 6.6 (2.2)                     | 3.7*       |
| Identity <sup>1</sup>                                     | 6.6 (2.1)   | 6.3 (2.2)                     | 6.6 (2.0)             | 6.9 (2.0)                     | 8.2*       |
| Illness concern <sup>1</sup>                              | 6.5 (2.3)   | 6.3 (2.4)                     | 6.5 (2.3)             | 6.5 (2.2)                     | 0.7        |
| Understanding                                             | 6.2 (2.4)   | 6.0 (2.5)                     | 6.0 (2.4)             | 6.4 (2.5)                     | 2.3        |
| Emotional response <sup>1</sup>                           | 7.7 (2.0)   | 7.6 (2.1)                     | 7.6 (2.0)             | 7.8 (1.9)                     | 1.3        |
| Hospital Anxiety and Depression Scale (HADS)              |             |                               |                       |                               |            |
| Total score                                               | 18.8 (6.9)  | 18.3 (6.8)                    | 19.1 (6.9)            | 18.5 (6.8)                    | 1.6        |
| Anxiety (cut off=>8) (n (%))                              | 926 (78.2)  | 255 (21.5)                    | 421 (35.6)            | 250 (21.1)                    | 2.2        |
| Depression (cut off=>8) (n (%))                           | 633 (53.5)  | 162 (13.7)                    | 294 (24.8)            | 177 (14.9)                    | 4.3        |
| Subjective Health Complaints (SHC)                        |             |                               |                       |                               |            |
| Total score                                               | 20.5 (10.6) | 19.2 (10.4)                   | 20.9 (10.4)           | 21.3(11.1)                    | 4.0*       |
| Self-reported health status (1-5) <sup>3</sup>            | 2.7 (0.8)   | 2.6 (0.8)                     | 2.7 (0.8)             | 2.9 (0.8)                     | 10.9*      |

All data are reported as mean (SD) unless stated otherwise (n (%)).

Significant between-group differences is reported as F-values or  $\chi$  in the final column to the right.

<sup>1</sup>=Higher score indicates more maladaptive illness perceptions

\*=significant at the .05 level

<sup>2</sup>=Higher score indicates perceiving work participation as more beneficial for health (mental health)

<sup>3</sup>=Lower score indicates better self-reported health status

1  
2  
3 **Predictors of benefit recipiency at 6 months follow-up regardless of work status at**  
4  
5 **baseline**

6  
7 **In the study population as a whole,** both uncertain and negative RTW-expectations predicted  
8  
9 **benefit recipiency** at 6 months follow-up (Table 2). The fully adjusted model showed that  
10  
11 other statistically significant predictors of **benefit recipiency** were gender (female), illness  
12  
13 duration (longer) and self-reported health status (moderate to poor). In the unadjusted model,  
14  
15 illness perceptions pertaining to *consequences* (more and severe) and *timeline* (long lasting),  
16  
17 ascribing many experienced symptoms to the illness (*identity*), being concerned about the  
18  
19 illness (*illness concern*), and experiencing emotional distress (*emotional response*), also  
20  
21 predicted **benefit recipiency**.  
22  
23  
24  
25  
26  
27  
28  
29  
30  
31  
32  
33  
34  
35  
36  
37  
38  
39  
40  
41  
42  
43  
44  
45  
46  
47  
48  
49  
50  
51  
52  
53  
54  
55  
56  
57  
58  
59  
60

Table 2. Logistic regression results of return-to-work expectations and illness perceptions as predictors of benefit recipiency at 6 months follow-up in the study population as a whole.

|                                          | Predictor variables                            | Unadjusted model           |                  | Adjusted model             |                  |
|------------------------------------------|------------------------------------------------|----------------------------|------------------|----------------------------|------------------|
|                                          |                                                | OR (95% CI)                | <i>p</i> -value  | OR (95% CI)                | <i>p</i> -value  |
| Basic demographics                       | Gender                                         | 1.18 (0.93 to 1.51)        | 0.171            | 1.55 (1.10 to 2.18)        | 0.011            |
|                                          | Age                                            | 1.00 (0.98 to 1.01)        | 0.963            | 1.00 (0.98 to 1.02)        | 0.529            |
|                                          | Educational level                              | 0.79 (0.62 to 1.00)        | 0.051            | 0.99 (0.68 to 1.43)        | 0.968            |
| Return-to-work expectations <sup>1</sup> | Uncertain                                      | <b>1.84 (1.33 to 2.53)</b> | <b>0.001</b>     | <b>2.07 (1.39 to 3.06)</b> | <b>&lt;0.001</b> |
|                                          | Negative                                       | <b>3.99 (2.91 to 5.47)</b> | <b>0.001</b>     | <b>3.89 (2.61 to 5.79)</b> | <b>&lt;0.001</b> |
| Illness Perceptions                      | Consequences                                   | <b>1.17 (1.10 to 1.25)</b> | <b>&lt;0.001</b> | 1.11 (0.98 to 1.25)        | 0.078            |
|                                          | Timeline                                       | <b>1.10 (1.05 to 1.16)</b> | <b>&lt;0.001</b> | 1.03 (0.95 to 1.11)        | 0.414            |
|                                          | Personal control*                              | 0.98 (0.93 to 1.03)        | 0.527            |                            |                  |
|                                          | Treatment control*                             | 0.97 (0.91 to 1.02)        | 0.260            |                            |                  |
|                                          | Identity                                       | <b>1.16 (1.09 to 1.22)</b> | <b>&lt;0.001</b> | 1.09 (0.98 to 1.21)        | 0.083            |
|                                          | Illness Concern                                | <b>1.06 (1.01 to 1.11)</b> | <b>0.017</b>     | 0.97 (0.89 to 1.06)        | 0.977            |
|                                          | Understanding*                                 | 1.00 (0.963 to 1.05)       | 0.713            |                            |                  |
|                                          | Emotional response                             | <b>1.05 (1.00 to 1.12)</b> | <b>0.049</b>     | 0.90 (0.81 to 1.00)        | 0.066            |
| Causal attributions                      | Work                                           | 0.82 (0.62 to 1.08)        | 0.173            |                            |                  |
|                                          | Stress                                         | 0.91 (0.62 to 1.32)        | 0.625            |                            |                  |
|                                          | Personal relationships                         | 0.83 (0.59 to 1.16)        | 0.294            |                            |                  |
| Mental health status                     | HADS total score                               | <b>1.02 (1.00 to 1.04)</b> | <b>0.009</b>     | 0.99 (0.96 to 1.02)        | 0.993            |
| Subjective health complaints             | SHC total score                                | <b>1.02 (1.01 to 1.03)</b> | <b>&lt;0.001</b> | 1.00 (0.98 to 1.01)        | 0.975            |
|                                          | Illness duration (in years)                    | <b>1.02 (1.01 to 1.04)</b> | <b>&lt;0.001</b> | <b>1.03 (1.01 to 1.05)</b> | <b>&lt;0.001</b> |
|                                          | Group allocation (intervention vs control)     | 1.03 (0.82 to 1.29)        | 0.774            |                            |                  |
|                                          | Blue-collar workers                            | <b>1.51 (1.18 to 1.93)</b> | <b>0.001</b>     | 1.44 (0.98 to 2.10)        | 0.057            |
|                                          | Private disability insurance                   | 1.15 (0.88 to 1.50)        | 0.292            |                            |                  |
|                                          | Work and health <sup>2</sup> (1-5)             | <b>0.89 (0.82 to 0.97)</b> | <b>0.008</b>     | 0.94 (0.85 to 1.05)        | 0.317            |
|                                          | Self reported health status <sup>3</sup> (1-5) | <b>1.43 (1.24 to 1.65)</b> | <b>&lt;0.001</b> | <b>1.26 (1.02 to 1.57)</b> | <b>0.033</b>     |

<sup>1</sup>Reference category: Positive RTW-expectations. <sup>2</sup>Higher score indicates perceiving work as having more positive effects on health. <sup>3</sup>Higher score indicates worse self-reported health status. \*Higher score indicates more adaptive illness perceptions. Significant results are highlighted in bold.

### Predictors of benefit recipiency in sub-groups

Of those at risk of going on sick leave 264 (79.0%) had managed to maintain their work participation six months later. Return-to-work was experienced by 288 (54.4%) of those on sick leave and by 73 (22.1%) of those on long-term benefits.

#### Group I: At risk of sick leave

For those at risk of going on sick leave, negative RTW-expectations and illness duration (in years) were the only significant predictors of benefit recipiency at 6 months follow-up in the unadjusted model. In the fully adjusted model, negative RTW-expectations remained the single significant predictor for benefit recipiency (Table 3).

#### Group II: On sick leave at baseline

In the unadjusted model for those who were on sick leave at baseline, both uncertain and negative RTW-expectations predicted benefit recipiency at 6 months follow-up. The illness perception components *consequences*, *timeline* and *identity*, were all individual predictors of benefit recipiency in the unadjusted model. Additionally, self-reported poor health, perceiving work as detrimental for health, higher scores on mental health status (HADS), subjective health complaints (SHC), occupational grade (blue collar work), and lower education were also predictors of benefit recipiency. In the fully adjusted model only uncertain and negative RTW-expectations remained significant predictors of benefit recipiency (Table 3).

#### Group III: On long-term benefits at baseline

In those on long-term benefits, only negative RTW-expectations predicted benefit recipiency in the unadjusted model. In the fully adjusted model negative RTW-expectations was borderline significant ( $p=0.050$ ) while female gender significantly predicted benefit recipiency (Table 3).

Table 3. Significant predictors of benefit recipiency in adjusted logistic regression models for sub-groups at risk of sick leave (n=334), on sick leave (n=529) or on long-term disability benefits (n=330).

|                                          |                                            | At risk of sick leave*     | On sick leave**            | On long-term benefits***   |
|------------------------------------------|--------------------------------------------|----------------------------|----------------------------|----------------------------|
|                                          |                                            | n=70                       | n=241                      | n=257                      |
| Benefit recipiency at 6 months follow-up |                                            |                            |                            |                            |
| Predictor variables                      |                                            | OR (95%CI)                 | OR (95%CI)                 | OR (95%CI)                 |
| Basic demographics                       | Gender                                     | 1.83 (0.89 to 3.78)        | 1.59 (0.99 to 2.56)        | <b>0.37 (0.17 to 0.79)</b> |
|                                          | Age                                        | 0.99 (0.95 to 1.03)        | 0.99 (0.97 to 1.02)        | 0.99 (0.96 to 1.02)        |
|                                          | Educational level                          | 1.06 (0.51 to 2.19)        | 0.71 (0.45 to 1.10)        | 1.46 (0.79 to 2.69)        |
| Return-to-work expectations <sup>2</sup> | Uncertain                                  | 1.92 (0.85 to 4.33)        | <b>2.62 (1.47 to 4.67)</b> | 0.61 (0.28 to 1.30)        |
|                                          | Negative                                   | <b>3.03 (1.22 to 7.53)</b> | <b>3.78 (2.11 to 6.76)</b> | 2.19 (1.00 to 4.79)        |
| Illness Perceptions                      | Consequences                               |                            | 1.10 (0.94 to 1.29)        |                            |
|                                          | Timeline                                   |                            | 1.01 (0.91 to 1.13)        |                            |
|                                          | Personal control*                          |                            |                            |                            |
|                                          | Treatment control*                         |                            |                            |                            |
|                                          | Identity                                   |                            | 1.03 (0.90 to 1.18)        |                            |
|                                          | Illness Concern                            |                            |                            |                            |
|                                          | Understanding*                             |                            |                            |                            |
| Causal attributions                      | Emotional response                         |                            |                            |                            |
|                                          | Work                                       |                            |                            |                            |
|                                          | Stress                                     |                            |                            |                            |
| Mental health status                     | Personal relationships                     |                            |                            |                            |
|                                          | HADS total score                           |                            | 0.99 (0.95 to 1.03)        |                            |
|                                          | SHC total score                            |                            | 1.00 (0.98 to 1.03)        |                            |
| Subjective health complaints             | Illness duration (in years)                | 1.03 (0.99 to 1.06)        | 1.02 (0.99 to 1.05)        |                            |
|                                          | Group allocation (intervention vs control) |                            |                            |                            |
|                                          | Blue-collar workers                        |                            | 1.09 (0.65 to 1.84)        |                            |
|                                          | Private disability insurance               |                            |                            |                            |

1  
2  
3  
4  
5  
6  
7  
8  
9  
10  
11  
12  
13  
14  
15  
16  
17  
18  
19  
20  
21  
22  
23  
24  
25  
26  
27  
28  
29  
30  
31  
32  
33  
34  
35  
36  
37  
38  
39  
40  
41  
42  
43  
44  
45  
46  
47  
48  
49

|                                                |                     |
|------------------------------------------------|---------------------|
| Work and health <sup>3</sup> (1-5)             | 0.87 (0.75 to 1.02) |
| Self reported health status <sup>4</sup> (1-5) | 1.24 (0.93 to 1.66) |

---

<sup>1</sup>Investigated in unadjusted logistic regression models for all three sub-groups, significant predictors carried forward to adjusted models: \*Adjusted for demographic variables gender, age educational level, illness duration and RTW-expectations, \*\*Adjusted for demographic variables gender, age educational level, RTW-expectations, illness perception components *consequences, timeline, identity*, mental health and subjective health complaints, illness duration, occupational grade, beliefs concerning the effect of work on health and self-reported health status \*\*\*Adjusted for demographic variables gender, age educational level and RTW-expectations.

<sup>2</sup> Reference category: Positive RTW-expectations. <sup>3</sup> Higher score indicates perceiving work as having more positive effects on health. <sup>4</sup> Higher score indicates worse self-reported health status. \*Higher score indicates more adaptive illness perceptions. Significant predictors highlighted in bold.

For peer review only



## DISCUSSION

### Main findings

In this study we investigated return-to-work expectations and illness perceptions as predictors of benefit recipiency in people with CMDs struggling with work participation. We further investigated RTW-expectations and illness perceptions as predictors of benefit recipiency in three pre-specified sub-groups based on participants' baseline status; at risk of sick leave, currently on sick leave, or on long-term benefits. Both uncertain and negative RTW-expectations were strong predictors of benefit recipiency in our study population as a whole, as well as in the sub-group of those currently sick-listed. There were differences in the predictive contribution of RTW-expectations and illness perceptions individually and relative to each other depending on participants' baseline status.

#### *Predictors of non-Return to Work*

##### Illness perceptions

Previous studies have shown that illness perceptions predict RTW after myocardial infarction and in musculoskeletal disorders[22, 30]. Furthermore, one study found beliefs about duration and consequences of illness acting as perpetuating factors in long-term sick leave for patients with a variety of disorders[31]. Our findings seem to show some similarities with previous studies. However, in the current study the associations were not maintained in the fully adjusted models.

None of the illness perceptions significantly predicted benefit recipiency in the adjusted model for those on sick leave, whilst uncertain and negative RTW-expectations did. From our previous

1  
2  
3 study, we saw that some of the illness perceptions were particularly strongly associated with the  
4  
5 uncertain and negative RTW-expectations[25]. We therefore find it plausible to assume that  
6  
7 although not statistically significant predictors of **benefit reciprocity** in this study, illness  
8  
9 perceptions may still be part of the underlying factors comprising RTW-expectations. It appears  
10  
11 intuitively and clinically sound that perceiving ones' illness as having more severe consequences  
12  
13 and affecting more life domains might impact on the RTW-process. One such impact could be  
14  
15 asserted on beliefs or decisions related to work participation, for instance when deciding on  
16  
17 readiness to RTW. Furthermore, believing that illness will last for a longer time is likely to  
18  
19 impact on how a person perceives the future possibilities for **work participation**, something that  
20  
21 could be involved in the construction and reporting of RTW-expectations. Future studies on  
22  
23 RTW in workers on **sick leave** with CMDs would benefit from including assessments on illness  
24  
25 perceptions in order to gain more knowledge on the role these psychological processes might  
26  
27 play.  
28  
29  
30  
31  
32  
33  
34  
35

### 36 Return-to-Work Expectations

37  
38 Our findings show that psychological factors such as ones' own uncertain or negative RTW –  
39  
40 expectations are strong predictors of **benefit reciprocity** in CMDs. This corresponds with  
41  
42 previous research showing RTW-expectations to repeatedly predict actual RTW[32-34].  
43  
44 Previous research findings suggest that health improvement alone is not enough to RTW, and  
45  
46 that psychological factors as well are of importance in RTW [35]. Self-efficacy is essential in the  
47  
48 processes that make us initiate and later sustain our behaviors[20]. Considering RTW-  
49  
50 expectations, these expectations would depend on a persons' belief in the ability to RTW. In our  
51  
52 study, RTW-expectations predicted **benefit reciprocity** more strongly than symptom severity of  
53  
54  
55  
56  
57  
58  
59  
60

1  
2  
3  
4  
5  
6  
7  
8  
9  
10  
11  
12  
13  
14  
15  
16  
17  
18  
19  
20  
21  
22  
23  
24  
25  
26  
27  
28  
29  
30  
31  
32  
33  
34  
35  
36  
37  
38  
39  
40  
41  
42  
43  
44  
45  
46  
47  
48  
49  
50  
51  
52  
53  
54  
55  
56  
57  
58  
59  
60

CMDs as measured by HADS. This finding is in contrast to one previous study where symptom severity was found to be an important predictor of RTW in a study population resembling the one studied here[13]. This may be due to the simple fact that this previous study did not include RTW-expectations. However, other studies have found symptom severity to predict RTW also when including RTW-expectations [33]. The findings from our study might be due to study population characteristics such as an expressed desire to work or the heterogeneous work status. We therefore suggest that future studies on work participation or RTW in CMDs include systematic evaluation of participants' RTW-expectations.

In our study, negative RTW-expectations predicted benefit reciprocity in those at risk of on sick leave. This subgroup consisted of people not yet on sick leave that self-reported CMDs as an obstacle for work participation. It is likely that those in this sub-group were on the verge of sick leave. This finding stresses the importance of identifying negative RTW-expectations early in cases where CMDs represent a barrier for optimal work participation. In an occupational health care setting including a focus on peoples' RTW-expectations alongside the focus on mental health improvement could be an important factor in preventing future sick-leave episodes and disability resulting from CMDs.

Another important finding of this study was that in those on sick leave, uncertain RTW-expectations predicted benefit reciprocity, although not as strongly as negative RTW-expectations. This corresponds with a previous study where uncertain RTW-expectations were associated with a longer time to RTW in workers with soft tissue injuries, with an even stronger association for negative RTW-expectations [36].

1  
2  
3 A persons' own predictions of time to RTW, as well as RTW-expectations, have been shown to  
4  
5 be better predictors of actual RTW than the opinion of health care professionals[33], and we  
6  
7 therefore suggest that addressing RTW-expectations in occupational health care would be useful.  
8  
9

10  
11  
12 An important characteristic of our study population was that participants' work statuses varied  
13  
14 from "at risk of sick leave" to "on sick leave" and "on long-term benefits". This heterogeneity  
15  
16 allowed for investigation of RTW-expectations and illness perceptions across work status. As a  
17  
18 result we were able to reveal that the predictive value of RTW-expectations may vary dependent  
19  
20 on work status, thus adding to the literature.  
21  
22

23  
24 Further, the B-IPQ, a reliable and rapid measure, was used to assess the participants' illness  
25  
26 perceptions. The use of this measure allowed for comparison with other study populations using  
27  
28 the B-IPQ, and ensured that we measured the participants' actual illness perceptions. The  
29  
30 procedure of a one-item measurement of RTW-expectations has previously been demonstrated to  
31  
32 be sufficient[37] and the single item used to measure RTW-expectations in the present study has  
33  
34 been found to measure important aspects of RTW-expectations in low back pain patients[38].  
35  
36 Additionally, we have previously used this item to investigate the association between illness  
37  
38 perceptions and RTW-expectations within the same study population as in the current study[25].  
39  
40 The use of registry based data to measure RTW secured complete follow-up on all participants  
41  
42 and eliminates common methods problems and is thereby a considerable strength of the study.  
43  
44  
45  
46  
47  
48

49  
50 Selection bias cannot be ruled out as a potential limitation of our study, as those choosing to join  
51  
52 this study could be qualitatively different from those declining to participate. However, as only  
53  
54 17 persons of 1416 screened declined to participate it can be argued that the study population is a  
55  
56

1  
2  
3 representative sample of the help-seeking population struggling with work participation due to  
4  
5  
6 CMDs in Norway.

7  
8 The classification of cases in this study was based on a hierarchical system that separated those  
9  
10 not receiving health related benefits at all from those receiving such benefits whether these were  
11  
12 full or partial. It is possible that a more nuanced classification of cases taking into account partial  
13  
14 benefits such as graded sick leave would yield other results.

15  
16  
17 In this study we used a version of B-IPQ failing to explicitly ask for participants' perceptions of  
18  
19 their CMDs, using the more generic term "your illness". This could represent a limitation to our  
20  
21 study if participants answered the B-IPQ with other illnesses than CMDs in mind. An important  
22  
23 characteristic shared by all participants, however, is that they all enter the study due to CMDs  
24  
25 being the primary reason for their struggles with work participation. Hence, we consider this  
26  
27 potential limitation to be of little importance.

28  
29  
30 Recent studies have shown that differences in RTW self-efficacy are more predictive of RTW  
31  
32 than RTW-expectations[39]. Failing to include extensive measures on RTW self-efficacy in our  
33  
34 study might represent a limitation. However, no extensive RTW self-efficacy measure is as of  
35  
36 yet available in Norwegian language, and we suggest that future studies include such measures  
37  
38 when available.  
39  
40  
41  
42  
43  
44

## 45 **Conclusion**

46  
47  
48 **The current study demonstrates that expectations about ones' own future work participation**  
49  
50 **(RTW-expectations) are strong predictors for future benefit recipiency. Those presenting**  
51  
52 **uncertain or negative RTW-expectations are more likely be recipients of health related benefits**  
53  
54 **six months later. We suggest that vocational rehabilitation services and occupational health care**  
55  
56

1  
2  
3 services pay attention to RTW-expectations alongside mental health improvement in workers  
4  
5 struggling with work participation due to CMDs.  
6  
7

8 As previous studies have highlighted, “short term sick leave may have consequences for future  
9  
10 sick leave beyond the effect of ill health” [40]. We believe our findings further stress the  
11  
12 importance of identifying negative or uncertain RTW-expectations early on, even before a sick  
13  
14 leave episode occurs.  
15  
16  
17  
18  
19

## 20 **Figure legends**

21  
22 Table 1: Baseline demographic and clinical characteristics of participants  
23

24  
25 Table 2: Logistic regression results of return-to-work expectations and illness perceptions as  
26  
27 predictors of non-RTW at 6 months follow-up regardless of sick leave status at baseline  
28

29  
30 Table 3: Significant predictors of non-RTW in adjusted logistic regression models for subgroups  
31  
32 working, but at risk of sick leave (n=334), on sick leave (n=529) or on long-term disability  
33  
34 benefits (n=330).  
35  
36  
37  
38

## 39 **Acknowledgements**

40  
41 This study was funded by the Norwegian Labour and Welfare Administration. Ingrid Blø Olsen  
42  
43 contributed to the categorisation of causal attributions on the Brief Illness Perception  
44  
45 Questionnaire and categorisation of participants’ occupational grade.  
46  
47  
48  
49  
50

## 51 **Author contributor statement**

1  
2  
3 CL contributed to data collection, conception and design of the study, performed data analysis,  
4  
5 interpreted findings, wrote up the first draft of the study and consequent revisions regarding  
6  
7 important intellectual content. WS contributed to critical revision of important intellectual  
8  
9 content and revision of analysis. SØ contributed to conception and design of the study, critical  
10  
11 revision of the manuscript and its analysis. SER contributed to conception and design of the  
12  
13 study, to the first draft of the study and its consequent revisions, and oversaw the revision of the  
14  
15 study.  
16  
17

18  
19  
20 SER is the guarantor of this study.  
21  
22

### 23 24 **Sources of funding and other support**

25  
26  
27 The project was commissioned by the Norwegian Ministry of Health and Ministry of Labour,  
28  
29 and financed through the National Strategy on Work and Mental Health (2007-2012). The funder  
30  
31 had an active role in the initiation and implementation of the project, but had no role in the  
32  
33 analyses of results or the decision to submit the article for publication.  
34  
35  
36  
37  
38

### 39 **Data sharing**

40  
41  
42 No additional data available.  
43  
44  
45  
46  
47  
48  
49  
50  
51  
52  
53  
54  
55  
56  
57  
58  
59  
60

## References

1. Waddell G, Burton K. Is work good for your health and well-being?, 2006.
2. Dekkers-Sanchez PM, Hoving JL, Sluiter JK, Frings-Dresen MHW. Factors associated with long-term sick leave in sick-listed employees: a systematic review *Occupational and Environmental Medicine* 2008;**65**:153-157.
3. Eaton WW, Martins SS, Nestadt G, Bienvenu OJ, Clarke D, Alexandre P. The Burden of Mental Disorders *Epidemiologic Reviews* 2008;**30**:1-14.
4. Stansfeld SA, Fuhrer R, Head J. Impact of common mental disorders on sickness absence in an occupational cohort study *Occupational and Environmental Medicine* 2011;**68**:408-413.
5. Brage S, Nossen JP, Kann IC, Thune O. Sykefravær med diagnose innen psykiske lidelser 2000 - 2011: The Norwegian Welfare and Labour Administration, 2012.
6. Knudsen AK, Harvey SB, Mykletun A, Overland S. Common mental disorders and long-term sickness absence in a general working population. The Hordaland Health Study *Acta Psychiatrica Scandinavica* 2013;**127**:287-297.
7. Knudsen AK, Overland S, Aakvaag HF, Harvey SB, Hotopf M, Mykletun A. Common mental disorders and disability pension award: Seven year follow-up of the HUSK study *Journal of Psychosomatic Research* 2010;**69**:59-67.
8. Blank L, Peters J, Pickvance S. A Systematic Review of the Factors which Predict Return to Work for People Suffering Episodes of Poor Mental Health *Journal of Occupational Rehabilitation* 2008;**18**:17-34.
9. Kessler RC, Petukhova M, Sampson NA, Zaslavsky AM, Wittchen H-U. Twelve-month and lifetime prevalence and lifetime morbid risk of anxiety and mood disorders in the United States *International Journal of Methods in Psychiatric Research* 2012;**21**:169-184.



10. Knudsen AK, Overland S, Hotopf M, Mykletun A. Lost Working Years Due to Mental Disorders: An Analysis of the Norwegian Disability Pension Registry *Plos One* 2012;**7**.
11. Henderson M, Harvey SB, Overland S, Mykletun A, Hotopf M. Work and common psychiatric disorders *Journal of the Royal Society of Medicine* 2011;**104**:198-207.
12. Cornelius LR, van der Klink JJJ, Groothoff JW, Brouwer S. Prognostic Factors of Long Term Disability Due to Mental Disorders: A Systematic Review *Journal of Occupational Rehabilitation* 2011;**21**:259-274.
13. Brouwers EP, Terluin B, Tiemens BG, Verhaak PF. Predicting return to work in employees sick-listed due to minor mental disorders *Journal of Occupational Rehabilitation* 2009;**19**:323-332.
14. Nielsen MBD, Bultmann U, Madsen IEH, *et al.* Health, work, and personal-related predictors of time to return to work among employees with mental health problems *Disability and Rehabilitation* 2012;**34**:1311-1316.
15. Andersen MF, Nielsen KM, Brinkmann S. Meta-synthesis of qualitative research on return to work among employees with common mental disorders *Scandinavian Journal of Work Environment & Health* 2012;**38**:93-104.
16. Labriola M, Lund T, Christensen KB, Kristensen TS. Multilevel analysis of individual and contextual factors as predictors of return to work *Journal of occupational and environmental medicine / American College of Occupational and Environmental Medicine* 2006;**48**:1181-1188.
17. Shaw WS, Reme SE, Linton SJ, Huang Y-H, Pransky G. 3(rd) place, PREMUS best paper competition: development of the return-to-work self-efficacy (RTWSE-19) questionnaire -

- 1  
2  
3 psychometric properties and predictive validity *Scandinavian Journal of Work Environment*  
4  
5 & Health 2011;**37**:109-119.  
6  
7
- 8 18. Lagerveld SE, Blonk RWB, Brenninkmeijer V, Schaufeli WB. Return to work among  
9  
10 employees with mental health problems: Development and validation of a self-efficacy  
11  
12 questionnaire *Work and Stress* 2010;**24**:359-375.  
13  
14
- 15 19. Bandura A. Self-efficacy: The exercise of control. New York: WH Freeman, 1997.  
16  
17
- 18 20. Bandura A. Self-efficacy - Toward a Unifying Theory of Behavioral Change *Psychological*  
19  
20 *Review* 1977;**84**:191-215.  
21  
22
- 23 21. Audhoe SS, Hoving JL, Nieuwenhuijsen K, *et al.* Prognostic Factors for the Work  
24  
25 Participation of Sick-Listed Unemployed and Temporary Agency Workers with  
26  
27 Psychological Problems *Journal of Occupational Rehabilitation* 2012:437-446.  
28  
29
- 30 22. Hoving JL, van der Meer M, Volkova AY, Frings-Dresen MH. Illness perceptions and work  
31  
32 participation: a systematic review *International archives of occupational and environmental*  
33  
34 *health* 2010;**83**:595-605.  
35  
36
- 37 23. Leventhal H, Benyamini Y, Brownlee S, *et al.* Illness representations: Theoretical  
38  
39 foundations. In: Weinman JA, Petrie KJ, eds. *Perceptions of Health and Illness*.  
40  
41 Amsterdam: Harwood Academic Publishers, 1997; 19 - 47.  
42  
43
- 44 24. Petrie KJ, Broadbent E, Kydd R. Illness perceptions in mental health: Issues and potential  
45  
46 applications *Journal of Mental Health* 2008;**17**:559-564.  
47  
48
- 49 25. Løvvik C, Øverland S, Hysing M, Broadbent E, Reme SE. Association Between Illness  
50  
51 Perceptions and Return-to-Work Expectations in Workers with Common Mental Health  
52  
53 Symptoms *Journal of Occupational Rehabilitation* 2013.  
54  
55  
56  
57  
58  
59  
60

- 1  
2  
3  
4  
5  
6  
7  
8  
9  
10  
11  
12  
13  
14  
15  
16  
17  
18  
19  
20  
21  
22  
23  
24  
25  
26  
27  
28  
29  
30  
31  
32  
33  
34  
35  
36  
37  
38  
39  
40  
41  
42  
43  
44  
45  
46  
47  
48  
49  
50  
51  
52  
53  
54  
55  
56  
57  
58  
59  
60
26. Lagerveld SE, Blonk RWB, Brenninkmeijer V, Wijngaards-de Meij L, Schaufeli WB. Work-Focused Treatment of Common Mental Disorders and Return to Work: A Comparative Outcome Study *Journal of Occupational Health Psychology* 2012;**17**:220-234.
27. Zigmond A, Snaith R. The hospital anxiety and depression scale *Acta Psychiatrica Scandinavica* 1983;**676**:361-370.
28. Eriksen HR, Ihlebaek C, Ursin H. A scoring system for subjective health complaints (SHC) *Scandinavian Journal of Public Health* 1999;**27**:63-72.
29. Broadbent E, Petrie KJ, Main J, Weinman J. The Brief Illness Perception Questionnaire *Journal of Psychosomatic Research* 2006;**60**:631-637.
30. Petrie KJ, Cameron LD, Ellis CJ, Buick D, Weinman J. Changing illness perceptions after myocardial infarction: An early intervention randomized controlled trial *Psychosomatic Medicine* 2002;**64**:580-586.
31. Dekkers-Sanchez PM, Wind H, Sluiter JK, Frings-Dresen MHW. A Qualitative Study of Perpetuating Factors for Long-term Sick Leave and Promoting Factors for Return to Work: Chronic Work Disabled Patients in Their Own Words *Journal of Rehabilitation Medicine* 2010;**42**:544-552.
32. Sampere M, Gimeno D, Serra C, *et al.* Return to Work Expectations of Workers on Long-Term Non-Work-Related Sick Leave *Journal of Occupational Rehabilitation* 2012;**22**:15-26.
33. Nieuwenhuijsen K, Verbeek JH, de Boer AG, Blonk RW, van Dijk FJ. Predicting the duration of sickness absence for patients with common mental disorders in occupational health care *Scandinavian Journal of Work Environment & Health* 2006;**32**:67-74.

- 1  
2  
3  
4  
5  
6  
7  
8  
9  
10  
11  
12  
13  
14  
15  
16  
17  
18  
19  
20  
21  
22  
23  
24  
25  
26  
27  
28  
29  
30  
31  
32  
33  
34  
35  
36  
37  
38  
39  
40  
41  
42  
43  
44  
45  
46  
47  
48  
49  
50  
51  
52  
53  
54  
55  
56  
57  
58  
59  
60
34. Mondloch MV, Cole DC, Frank JW. Does how you do depend on how you think you'll do?  
A systemic review of the evidence for a relation between patients' recovery expectations and  
health outcomes (vol 165, 174, 2001) *Canadian Medical Association Journal*  
2001;**165**:1303-1303.
35. D'Amato A, Zijlstra F. Toward a Climate for Work Resumption: The Nonmedical  
Determinants of Return to Work *Journal of Occupational and Environmental Medicine*  
2010;**52**:67-80.
36. Cole DC, Mondloch MV, Hogg-Johnson S. Listening to injured workers: how recovery  
expectations predict outcomes - a prospective study *Canadian Medical Association Journal*  
2002;**166**:749-754.
37. Reme SE, Hagen EM, Eriksen HR. Expectations, perceptions, and physiotherapy predict  
prolonged sick leave in subacute low back pain *Bmc Musculoskeletal Disorders* 2009;**10**.
38. Haldorsen EMH. Return to work in low back pain patients *Department of Biological and  
Medical Psychology*. Bergen: University of Bergen, 1998.
39. Nieuwenhuijsen K, Noordik E, van Dijk FJ, van der Klink JJ. Return to Work Perceptions  
and Actual Return to Work in Workers with Common Mental Disorders *Journal of  
Occupational Rehabilitation* 2013;**23**:290-299.
40. Hultin H, Lindholm C, Malfert M, Moller J. Short-term sick leave and future risk of sickness  
absence and unemployment - the impact of health status *BMC public health* 2012;**12**.

STROBE 2007 (v4) Statement—Checklist of items that should be included in reports of *cohort studies*

| Section/Topic                | Item # | Recommendation                                                                                                                                                                       | Reported on page # |
|------------------------------|--------|--------------------------------------------------------------------------------------------------------------------------------------------------------------------------------------|--------------------|
| Title and abstract           | 1      | (a) Indicate the study's design with a commonly used term in the title or the abstract                                                                                               | 1                  |
|                              |        | (b) Provide in the abstract an informative and balanced summary of what was done and what was found                                                                                  | 2, 3               |
| <b>Introduction</b>          |        |                                                                                                                                                                                      |                    |
| Background/rationale         | 2      | Explain the scientific background and rationale for the investigation being reported                                                                                                 | 5, 6, 7            |
| Objectives                   | 3      | State specific objectives, including any prespecified hypotheses                                                                                                                     | 8                  |
| <b>Methods</b>               |        |                                                                                                                                                                                      |                    |
| Study design                 | 4      | Present key elements of study design early in the paper                                                                                                                              | 2, 8, 9            |
| Setting                      | 5      | Describe the setting, locations, and relevant dates, including periods of recruitment, exposure, follow-up, and data collection                                                      | 8,                 |
| Participants                 | 6      | (a) Give the eligibility criteria, and the sources and methods of selection of participants. Describe methods of follow-up                                                           | 9,                 |
|                              |        | (b) For matched studies, give matching criteria and number of exposed and unexposed                                                                                                  | -                  |
| Variables                    | 7      | Clearly define all outcomes, exposures, predictors, potential confounders, and effect modifiers. Give diagnostic criteria, if applicable                                             | 10, 11             |
| Data sources/<br>measurement | 8*     | For each variable of interest, give sources of data and details of methods of assessment (measurement). Describe comparability of assessment methods if there is more than one group | 10, 11             |
| Bias                         | 9      | Describe any efforts to address potential sources of bias                                                                                                                            | 8, 9               |
| Study size                   | 10     | Explain how the study size was arrived at                                                                                                                                            | 8, 9               |
| Quantitative variables       | 11     | Explain how quantitative variables were handled in the analyses. If applicable, describe which groupings were chosen and why                                                         | 10, 11, 12         |
| Statistical methods          | 12     | (a) Describe all statistical methods, including those used to control for confounding                                                                                                | 11, 12             |
|                              |        | (b) Describe any methods used to examine subgroups and interactions                                                                                                                  | 11, 12             |
|                              |        | (c) Explain how missing data were addressed                                                                                                                                          | 11, 12, 13         |
|                              |        | (d) If applicable, explain how loss to follow-up was addressed                                                                                                                       | -(11)              |
|                              |        | (e) Describe any sensitivity analyses                                                                                                                                                | -                  |
| <b>Results</b>               |        |                                                                                                                                                                                      |                    |

|                          |     |                                                                                                                                                                                                              |                    |
|--------------------------|-----|--------------------------------------------------------------------------------------------------------------------------------------------------------------------------------------------------------------|--------------------|
| Participants             | 13* | (a) Report numbers of individuals at each stage of study—eg numbers potentially eligible, examined for eligibility, confirmed eligible, included in the study, completing follow-up, and analysed            | 13                 |
|                          |     | (b) Give reasons for non-participation at each stage                                                                                                                                                         | -                  |
|                          |     | (c) Consider use of a flow diagram                                                                                                                                                                           | 9                  |
| Descriptive data         | 14* | (a) Give characteristics of study participants (eg demographic, clinical, social) and information on exposures and potential confounders                                                                     | 12, 13, 16         |
|                          |     | (b) Indicate number of participants with missing data for each variable of interest                                                                                                                          | -                  |
|                          |     | (c) Summarise follow-up time (eg, average and total amount)                                                                                                                                                  | 9                  |
| Outcome data             | 15* | Report numbers of outcome events or summary measures over time                                                                                                                                               | 17                 |
| Main results             | 16  | (a) Give unadjusted estimates and, if applicable, confounder-adjusted estimates and their precision (eg, 95% confidence interval). Make clear which confounders were adjusted for and why they were included | 10, 15, 17,        |
|                          |     | (b) Report category boundaries when continuous variables were categorized                                                                                                                                    | 10, 11, 13         |
|                          |     | (c) If relevant, consider translating estimates of relative risk into absolute risk for a meaningful time period                                                                                             | -                  |
| Other analyses           | 17  | Report other analyses done—eg analyses of subgroups and interactions, and sensitivity analyses                                                                                                               | 16, 17, 18         |
| <b>Discussion</b>        |     |                                                                                                                                                                                                              |                    |
| Key results              | 18  | Summarise key results with reference to study objectives                                                                                                                                                     | 20                 |
| <b>Limitations</b>       |     |                                                                                                                                                                                                              |                    |
| Interpretation           | 20  | Give a cautious overall interpretation of results considering objectives, limitations, multiplicity of analyses, results from similar studies, and other relevant evidence                                   | 20, 21, 22, 23, 24 |
| Generalisability         | 21  | Discuss the generalisability (external validity) of the study results                                                                                                                                        | 22, 23, 24         |
| <b>Other information</b> |     |                                                                                                                                                                                                              |                    |
| Funding                  | 22  | Give the source of funding and the role of the funders for the present study and, if applicable, for the original study on which the present article is based                                                | 25                 |

\*Give information separately for cases and controls in case-control studies and, if applicable, for exposed and unexposed groups in cohort and cross-sectional studies.

**Note:** An Explanation and Elaboration article discusses each checklist item and gives methodological background and published examples of transparent reporting. The STROBE checklist is best used in conjunction with this article (freely available on the Web sites of PLoS Medicine at <http://www.plosmedicine.org/>, Annals of Internal Medicine at <http://www.annals.org/>, and Epidemiology at <http://www.epidem.com/>). Information on the STROBE Initiative is available at [www.strobe-statement.org](http://www.strobe-statement.org).
